# Supplementary material for: Analysis of geological glasses by electron probe microanalysis under low beam current density conditions
Source: Royal Society of Chemistry journal article supplement (doi:10.1039/d3ja00183k), 2023-01-01
Supplement: d3ja00183k1.pdf [file d3ja00183k1.pdf]

**ESI Figure 1**

Instantaneous (Inst.) relative intensities vs. counting time for K  $K\alpha$  X-ray in BHVO-2G, CGSG-5, ATHO-G, CGSG-1, Obsidian, and CGSG-2 reference glasses respectively under 20nA beam current and 15kV accelerating voltage but different beam diameters. Solid lines are from quadratic polynomial fitting to instantaneous points collected at about 0.2 s interval by chart recorder function.

**ESI Figure 2**

Count rate vs. counting time for Na  $K\alpha$  X-ray in BHVO-2G reference glasses under relative high beam conditions (U:15 kV, I:20 nA). Beam diameters are set to 0, 3.5, 7, and 10.5  $\mu\text{m}$  for (a-d) respectively. points were collected at about 0.2 s interval by chart recorder function.

**ESI Figure 3**

Back-scattered images for BL-5 (a-b) and D2-6 (c-d) hydrous glasses. Compared to BL-5, which is synthesized with Tuttle pressure vessel, there are plenty of microcrystal inclusions, such as quartz, titanomagnetite, feldspar et al., in D2-6 (synthesized with piston cylinder press) matrix.
