# Supplementary material for: Analysis of geological glasses by electron probe microanalysis under low beam current density conditions
Source: Royal Society of Chemistry journal article supplement (doi:10.1039/d3ja00183k), 2023-01-01
Supplement: d3ja00183k5.xlsx [file d3ja00183k5.xlsx]

## Sheet: GeoReM or published vaues
Provider	NRCG								MPI-DING														USGS								NIST		NIST		IGGCAS												SPI	USGS
Sample name	CGSG-1		CGSG-2		CGSG-4		CGSG-5		KL2-G		ML3B-G		StHs6/80-G		ATHO-G		T1-G		GOR128-G		GOR132-G		BIR-1G		BHVO-2G		BCR-2G		GSE-1G		NIST 610		NIST 612		ARM-1		ARM-2		ARM-3		OJY-1		OH-1		OA-1		Obsidian	GSP-2
Lithology	Alkali basalt from Tibet		Syenite		Soil from Beijing		Andesite		Kilauea tholeiitic basalt		Mauna Loa tholeiitic basalt		St. Helens andesitic ash		Iceland rhyolite		Italian Alps quartz diorite		Gorgona Island komatiite		Gorgona Island komatiite		Icelandic basalt		Hawaiian volcanic observatory basalt		Columbia river basalt		Synthetic glasses with a basaltic major element composition		synthetic soda-lime glass		synthetic soda-lime glass		Synthetic andesitic glass		Synthetic andesitic glass		Synthetic andesitic glass		Natural andesitic glass		Natural obsidian glass		Natural obsidian glass		Natural obsidian glass	Granodiorite(powder)
	Value	2SE	Value	2SE	Value	2SE	Value	2SE	Value	95%CL	Value	95%CL	Value	95%CL	Value	95%CL	Value	95%CL	Value	95%CL	Value	95%CL	Value	SD	Value	SD	Value	SD	Value	SD	Value	95%CL	Value	95%CL	Value	2SE	Value	2SE	Value	2SE	Value	2SE	Value	2SE	Value	2SE	Value	Value	SD
Major element	（%）	（%）	（%）	（%）	（%）	（%）	（%）	（%）	（%）	（%）	（%）	（%）	（%）	（%）	（%）	（%）	（%）	（%）	（%）	（%）	（%）	（%）	（%）	（%）	（%）	（%）	（%）	（%）	（%）	（%）	（%）	（%）	（%）	（%）	（%）	（%）	（%）	（%）	（%）	（%）	（%）	（%）	（%）	（%）	（%）	（%）	（%）	（%）	（%）
SiO2	52.7	0.2	54.2	0.2	63.1	1.1	56.3	1.1	50.3	0.3	51.4	0.6	63.7	0.5	75.6	0.7	58.6	0.4	46.1	0.4	45.5	0.4	47.5	0.3	49.3	0.1	54.4	0.4	53.7	1.5	69.7	0.5	72.1	0.6	58.4	0.5	57.9	0.5	60.3	0.08	59.1	0.3	76.1	0.3	76.3	0.2	73.94	66.6	0.02
TiO2	2.19	0.06	0.589	0.019	0.609	0.026	0.497	0.024	2.56	0.09	2.13	0.09	0.703	0.021	0.255	0.016	0.755	0.017	0.288	0.012	0.306	0.013	1.04	0.07	2.79	0.02	2.27	0.04	0.075	0.007					0.98	0.03	0.97	0.04	1.01	0.03	0.62	0.011	0.063	0.004	0.092	0.004	0.1	0.66	0.02
Al2O3	17.4	0.2	20.8	0.2	14.7	0.2	15.5	0.3	13.3	0.2	13.6	0.2	17.8	0.2	12.2	0.2	17.1	0.2	9.91	0.17	11	0.2	15.5	0.2	13.6	0.1	13.4	0.4	13	0.4	1.95	0.04	2.03	0.04	13.3	0.1	13.1	0.1	13.8	0.1	11.4	0.04	12.7	0.17	13	0.12	13.11	14.9	0.2
FeO(t)	7.77	0.12	6.77	0.1	4.58	0.09	4.46	0.09	10.7	0.1	10.9	0.1	4.37	0.07	3.27	0.1	6.44	0.06	9.81	0.12	10.1	0.1	10.4	0.1	11.3	0.1	12.4	0.3	12.7	0.3					5.72	0.1	5.72	0.1	5.91	0.09	5.37	0.07	1.02	0.02	0.562	0.008	1.72	4.40908	0.14397
Fe2O3(t)	8.63514	0.133361	7.52379	0.111134	5.08995	0.100021	4.95659	0.100021	11.8914	0.111134	12.1136	0.111134	4.85657	0.077794	3.63409	0.111134	7.15705	0.0666806	10.9023	0.133361	11.2246	0.111134	11.558	0.111134	12.5582	0.111134	13.7807	0.333403	14.1141	0.333403					6.35688	0.111134	6.35688	0.111134	6.56804	0.100021	5.96791	0.077794	1.13357	0.0222269	0.624575	0.00889074	1.91151	4.9	0.16
MnO	0.123	0.002	0.127	0.004	0.107	0.003	0.0883	0.0034	0.165	0.009	0.17	0.009	0.076	0.004	0.106	0.005	0.127	0.006	0.176	0.009	0.154	0.007	0.19	0.01	0.17	0.03	0.19	0.01							0.04	0.01	0.05	0.01	0.05	0.01	0.121	0.003	0.043	0.003	0.07	0.003	0.06	0.032	0.002
MgO	3.92	0.06	0.856	0.041	2.11	0.04	1.49	0.07	7.34	0.09	6.59	0.08	1.97	0.04	0.103	0.01	3.75	0.04	26	0.3	22.4	0.2	9.4	0.1	7.13	0.02	3.56	0.09	3.5	0.03					3.78	0.11	3.74	0.1	3.51	0.08	6.38	0.05	0.02	0.004	0.064	0.005	0.07	0.96	0.03
CaO	5.86	0.1	1.68	0.04	6.95	0.13	4.67	0.13	10.9	0.2	10.5	0.1	5.28	0.09	1.7	0.03	7.1	0.09	6.24	0.12	8.45	0.12	13.3	0.2	11.4	0.1	7.06	0.11	7.4	0.3	11.4	0.2	11.9	0.1	5.07	0.06	5.01	0.07	5.32	0.04	11.9	0.1	0.545	0.014	0.511	0.02	0.76	2.1	0.06
Na2O	3.8	0.12	6.51	0.23	2.74	0.17	11.3	0.7	2.35	0.08	2.4	0.06	4.44	0.14	3.75	0.31	3.13	0.09	0.574	0.026	0.83	0.04	1.85	0.07	2.4	0.1	3.23	0.07	3.9	0.2	13.4	0.3	13.7	0.3	4.43	0.04	4.42	0.05	4.66	0.05	1.46	0.03	4.01	0.04	4.11	0.04	4.06	2.78	0.09
K2O	3.93	0.06	6.75	0.32	2.6	0.05	1.92	0.04	0.48	0.01	0.385	0.004	1.29	0.02	2.64	0.09	1.96	0.04	0.036	0.005	0.0308	0.0034	0.03	0.005	0.51	0.02	1.74	0.04	2.6	0.1					3.13	0.02	3	0.05	3.18	0.04	2.61	0.04	4.67	0.07	4.58	0.06	5.04	5.38	0.14
P2O5	1.15	0.07	0.087	0.013	0.257	0.014	0.204	0.015	0.232	0.026	0.23	0.025	0.164	0.018	0.025	0.004	0.168	0.026	0.025	0.005	0.036	0.012	0.027	0.003	0.29	0.02	0.37	0.01							0.26	0.01	0.29	0.01	0.27	0.02	0.11	0.007	0.012	0.005	0.015	0.004		0.29	0.02
H2O									0.015		0.015		0.025		0.014		0.026		0.026		0.026										0.013		0.021														0.8	0.94
Sum1	99.7081		99.1228		98.263		96.9259		99.5334		99.5336		100.305		100.027				100.277		99.9574		100.395		100.148		100.001		98.2891				99.751		95.7469		94.8369		98.668		99.6689		99.2966		99.3666		99.8515	99.542
Trace element	（10-6）	（10-6）	（10-6）	（10-6）	（10-6）	（10-6）	（10-6）	（10-6）	（10-6）	（10-6）	（10-6）	（10-6）	（10-6）	（10-6）	（10-6）	（10-6）	（10-6）	（10-6）	（10-6）	（10-6）	（10-6）	（10-6）	（10-6）	（10-6）	（10-6）	（10-6）	（10-6）	（10-6）	（10-6）	（10-6）	（10-6）	（10-6）	（10-6）	（10-6）	（10-6）	（10-6）	（10-6）	（10-6）	（10-6）	（10-6）	（10-6）	（10-6）	（10-6）	（10-6）	（10-6）	（10-6）	（10-6）	（10-6）	（10-6）
C																																																382
F									177		70		320		0.7		321		25		22										304		80	89														3000
S									7.7		1.2		2.7		0.6		2.6		4.3		1.8										575	32	377	70														600
Cl									26		7.5		231	50	430		113	37	12		6.2										274	67	142	58														400
Ag	0.88	0.18	1.02	0.034	1.18	0.26	0.4	0.067	0.15		0.03		0.02		0.3		0.1		0.5		0.04						0.5	0.4	200	20	251	9	22	0.3							0.084	0.005	0.091	0.01	0.047	0.007
As	3.3	2.93	5.82	1.44	2.31	2.11	2.89	0.57	0.17		0.28		2.73	0.48	1.4	0.5	0.96	0.44	0.1		0.16								260	90	325	18	35.7	5.5	3360	181	3480	140	3780	170	3.72	0.28	17.7	13.5	3.74	0.47
Au	0.02		0.06		0.05		0.02		0.4		0.065	0.082	0.048	0.032	0.03	0.03	0.1	0.11	0.024		0.11	0.09							7		23.6	1.7	4.77	0.31
B	37.5	3.66	614	203	1575	518	4732	2675	2.73	0.28	2.5	0.6	11.8	1.3	5.7	0.5	4.1	1.1	23.5	2.8	17.2	2.6					6	1	330	120	350	56	34.3	1.7	463	52	10500	770	60.6	3.7	50.3	3.7	35.5	2.4	39	3.5
Ba	2243	45	395	15	736	16	919	25	123	5	80.1	2.2	298	9	547	16	388	12	1.06	0.03	0.815	0.062	6.5	0.07	131	2	683	7	427	5	452	9	39.3	0.9	2030	53	249	5	28.4	0.5	832	15	23.9	0.8	364	12.5		1340	44
Be	3.38	0.27	16.9	1.93	2.96	0.22	2.2	0.25	0.88	0.34	0.62	0.14	1.2	0.1	3.2	0.34	2	0.6	0.034	0.007	0.08		0.1		1.3	0.2	2.3	0.4	490	80	476	31	37.5	1.5	475	22	54.7	1.5	6.29	0.34	1.9	0.06	4.1	0.1	3.62	0.16		1.5
Bi	1.07	0.13	1.1	0.19	0.26	0.03	0.22	0.02	0.036	0.014	0.006	0.009	0.11	0.07	0.05		0.1	0.05	0.0009		0.007	0.003	0.009	0.002	0.01	0.002	0.05	0.01	320	30	384	26	30.2	2.3	591	40	69.9	3.7	13.9	0.7	0.037	0.01	0.19	0.024	0.275	0.015
Cd	0.14		0.094		0.09		0.073		0.09		0.1		0.1		0.5		0.2		0.072		0.08		0.14	0.04	0.1	0.02	0.2		160	50	270	16	28.1	1.1	463	20	50.2	2.2	6	0.46	0.144	0.064	0.271	0.129	0.548	0.848		0.2	0.05
Ce	349	15	248	10	73	1.9	53.3	0.7	32.4	0.7	23.1	0.3	26.1	0.7	121	4	127	4	0.45	0.016	0.393	0.018	1.89	0.04	37.6	0.2	53.3	0.5	414	4	453	8	38.4	0.7	444	14	53.7	0.9	7.97	0.54	59.9	1.7	48	1.5	38.2	1		410	30
Co	24	2	6.4	1.3	12	0.5	11.8	0.4	41.2	2.3	41.2	3.5	13.2	1.1	2.13	0.47	18.9	0.8	92.4	6.2	92.7	5.7	52	5	44	2	38	2	380	20	410	10	35.5	1	497	9	59.6	0.7	7.45	0.22	13.4	0.3	0.135	0	0.121	0.026		7.3	0.8
Cr	58		32		90		44		294	27	177	23	16.9	3.3	6.1	1.4	20.9	2	2272	171	2528	183	392	24	293	12	17	2	400	80	408	10	36.4	1.5	463	38	61	6.1	9.07	1.85	75.6	3.3	0.973	0.6	0.753	0.339		20
Cs	0.9	0.09	1.87	0.18	4.5	0.3	1.34	0.09	0.115	0.009	0.14	0.012	1.75	0.11	1.08	0.11	2.69	0.19	0.24	0.025	7.45	0.63	0.007	0.002	0.1	0.02	1.16	0.07	310	20	366	9	42.7	1.8	474	19	51.9	1.7	7.53	0.22	4.85	0.12	5.45	0.1	3.34	0.18		1.2	0.1
Cu	18.9	0.4	20.5	1.2	41.1	2.3	50.5	1.8	87.9	9.1	112	10	41.5	8.3	18.6	2.2	18.8	2	63.8	12.5	205	21	119	12	127	11	21	5	380	40	441	15	37.8	1.5	446	19	55.6	3.1	13.6	0.8	149	3	2.39	0.6	0.893	0.815		43	4
Dy	5.97	0.29	4.78	0.19	4.11	0.18	1.88	0.08	5.22	0.12	4.84	0.07	2.22	0.06	16.2	0.7	4.5	0.12	1.98	0.07	2.15	0.06	2.55	0.02	5.28	0.05	6.44	0.06	524	6	437	11	35.5	0.7	453	13	53.6	1.3	6.18	0.19	4.61	0.15	3.97	0.11	3.34	0.12		6.1
Er	2.39	0.17	2.53	0.16	2.43	0.11	0.93	0.04	2.54	0.07	2.44	0.05	1.18	0.04	10.3	0.5	2.49	0.08	1.4	0.06	1.56	0.05	1.7	0.02	2.56	0.02	3.7	0.04	595	6	455	14	38	0.9	461	10	52.8	1	6.28	0.16	2.77	0.09	2.49	0.1	2.14	0.08		2.2
Eu	4.14	0.11	2.42	0.07	1.22	0.05	1.05	0.03	1.92	0.04	1.67	0.02	0.953	0.022	2.76	0.1	1.21	0.04	0.264	0.008	0.255	0.007	0.517	0.005	2.07	0.01	1.97	0.02	410	20	447	12	35.6	0.8	457	12	50.7	0.7	5.71	0.14	1.07	0.04	0.139	0.005	0.337	0.022		2.3	0.1
Ga	27	1.3	37	3	18	1	18.4	0.5	20	1.2	19.6	2.1	20.9	2.7	25.3	2.4	19.4	0.9	8.67	1.07	10.4	0.9	15	2	22	3	23	1	490	70	433	13	36.9	1.5	489	23	69.9	2.9	17.7	0.4	15.2	0.6	17.1	0.6	14.8	0.7		22	2
Gd	11.3	0.9	6.77	0.37	4.56	0.25	2.69	0.12	5.92	0.2	5.26	0.23	2.59	0.09	15.3	0.7	5.31	0.29	1.17	0.04	1.19	0.04	1.85	0.02	6.16	0.05	6.71	0.07	514	6	449	12	37.3	0.9	446	13	48.9	0.8	6	0.14	4.75	0.18	3.94	0.13	2.78	0.1		12	2
Ge	1.4	0.2	1.4	0.7	1.3	0.3	1	0.2	1.3	0.8	1.1	1.1	1.1	0.7	1.8	0.9	1.8	1.5	0.96		0.68		1.2	0.1	1.6	0.1	1.5	0.1	320	80	447	78	36.1	3.8	626	32	68.3	4.7	8.84	0.79	3.8	1.86	3.34	1.64	1.57	0.04
Hf	11.6	1.4	35.5	3.3	6.83	0.48	4.77	0.26	3.93	0.14	3.22	0.08	3.07	0.09	13.7	0.5	3.88	0.15	0.349	0.017	0.357	0.018	0.57	0.03	4.32	0.18	4.84	0.28	395	7	435	12	36.7	1.2	457	16	51.5	1	6.21	0.15	4.59	0.17	4.44	0.22	3.11	0.12		14	1
Ho	0.95	0.04	0.87	0.03	0.82	0.03	0.34	0.02	0.961	0.022	0.906	0.018	0.42	0.011	3.43	0.11	0.86	0.031	0.443	0.019	0.507	0.019	0.56	0.03	0.98	0.04	1.27	0.08	501	8	449	12	38.3	0.8	450	18	50.6	2.1	7.17	0.25	0.945	0.037	0.84	0.033	0.707	0.028		1	0.1
In	0.22		0.41		0.21		0.14		0.24		0.2		0.5		0.17		0.3	0.4	0.067		0.09		0.086	0.013	0.1	0.02	0.11	0.02	370	60	434	19	38.9	2.1							0.06	0.005	0.059	0.012	0.03	0.007
La	164	5	154	4	40.5	1.3	30.4	0.9	13.1	0.2	8.99	0.13	12	0.3	55.6	1.5	70.4	2.4	0.121	0.004	0.0842	0.0029	0.609	0.02	15.2	0.2	24.7	0.3	392	4	440	10	36	0.7	452	11	52	1.1	6.62	0.15	28.7	0.6	23.2	0.6	20.5	0.8		180	12
Li	24	1.85	411	32.1	1120	68.7	1905	164	5.1	0.5	4.5	0.4	20.7	2.3	28.6	1.8	19.9	0.9	10.4	1.7	8.9	1.2	3	0.7	4.4	0.8	9	1	430	60	468	24	40.2	1.3	511	21	1230	62	18.6	1	38.5	0.9	44.7	1	43.5	1.2		36	1
Lu	0.25	0.02	0.39	0.02	0.36	0.02	0.12	0.01	0.285	0.009	0.286	0.006	0.168	0.006	1.54	0.05	0.354	0.012	0.206	0.009	0.237	0.009	0.248	0.009	0.279	0.003	0.503	0.005	518	6	439	8	37	0.9	446	13	48.6	1.5	6.48	0.19	0.412	0.013	0.393	0.018	0.353	0.02		0.23
Mo	2.8	0.19	0.92	0.1	1.92	0.1	0.89	0.05	3.6	0.6	16.7	2.3	2	0.6	4.8	1	4.2	1.8	0.71	0.26	30.5	2.6	0.075	0.011	3.8	0.2	270	30	390	30	417	21	37.4	1.5	486	17	57.2	2.3	9.49	0.27	1.29	0.05	2.63	0.1	6.29	0.17		2.1	0.6
Nb	52.8	1.8	70.7	3.1	14.6	0.4	10.3	0.3	15	0.5	8.61	0.22	6.94	0.25	62.4	2.6	8.87	0.43	0.099	0.007	0.073	0.013	0.52	0.04	18.3	0.8	12.5	1	420	40	465	34	38.9	2.1	471	14	57.7	1.4	12.2	0.4	11.3	0.4	20.9	0.7	29.2	1.2		27	2
Nd	132	5	72.5	2.7	30.6	1.3	22.3	0.7	21.6	0.4	16.7	0.2	13	0.3	60.9	2	41.4	1.2	0.784	0.047	0.689	0.017	2.37	0.03	24.5	0.2	28.9	0.3	453	5	430	8	35.5	0.7	440	16	55.5	1.4	7.53	0.42	26.5		20.8		12.6			200	12
Ni	37.1	1.3	4.2	0.5	29	1.5	16	0.5	112	5	107	9	23.7	3.8	13	5	10.6	1.3	1074	61	1187	58	178	18	116	7	13	2	440	30	458.7	4	38.8	0.2	473	17	59.2	1.9	12.3	1.4	33.4	0.4	0.292	0.2	0.328	0.171		17	2
Pb	32.6	1.3	138	12	47	3	20.8	1.3	2.07	0.1	1.38	0.07	10.3	0.9	5.67	0.62	11.6	1.5	0.345	0.043	19.5	1.7	3.7	0.3	1.7	0.2	11	1	378	12	426	1	38.57	0.2	614	34	76.2	3.4	12.7	0.6	39.1	0.9	27.4	0.6	19.5	0.4		42	3
Pr	35.3	1	22.1	1	7.97	0.28	5.62	0.14	4.6	0.1	3.43	0.06	3.2	0.06	14.6	0.4	12.4	0.4	0.1	0.004	0.089	0.004	0.37	0.02	5.35	0.22	6.7	0.4	460	10	448	7	37.9	1	430	18	49.8	1.6	5.68	0.21	6.92	0.24	5.65	0.16	3.99	0.18		51	5
Rb	106	5	125	7	85	4	39	2	8.7	0.4	5.8	0.21	30.7	1.7	65.3	3	79.7	3.5	0.406	0.025	2.1	0.1	0.197	0.007	9.2	0.04	47	0.5	356	4	425.7	1	31.4	0.4	486	21	57.6	2.7	7.54	0.34	95.9		185		120			245	7
Sb	1.3	0.2	1.9	0.3	2.1	0.2	1.3	0.1	0.14	0.03	0.11	0.05	0.2	0.07	0.32	0.1	0.25	0.05	0.01	0.021	0.06	0.04	0.56	0.09	0.3	0.13	0.35	0.08	450	110	396	19	34.7	1.8	533	29	62.6	3.7	13	0.8	0.936	0.079	0.857	0.054	0.336	0.044		0.27	0.08
Sc	12.2	0.5	4.3	0.9	10.5	0.5	8.74	0.4	31.8	0.9	31.6	1.6	11.5	0.8	5	0.8	26.9	1.1	32.1	1.4	36.5	1.2	43	3	33	2	33	2	530	20	455	10	39.9	2.5	428	42	51.5	1.2	7.02	0.36	12.6	0.3	1.89	0.32	2.6	0.25		6.3	0.7
Sm	18.1	0.8	9.65	0.34	5.43	0.29	3.62	0.12	5.54	0.09	4.75	0.07	2.78	0.05	14.2	0.4	6.57	0.14	0.525	0.02	0.508	0.015	1.09	0.02	6.1	0.03	6.59	0.07	488	5	453	11	37.7	0.8	462	13	51.6	1	6	0.1	5.28		4.44		2.79			27	1
Sn	6.4	1.8	11	2	10	1	3.7	0.7	1.54	0.29	1.14	0.33	1.1	0.2	5.41	0.73	2	0.5	0.224	0.092	0.34	0.09	2.3	1.3	2.6	0.6	2.6	0.4	280	50	430	29	38.6	1.3	592	25	72.8	2.8	12.3	1.1	3.6	0.49	3.66	0.53	2	0.09		3	0.5
Sr	1317	32	1200	41	390	14	795	31	356	8	312	4	482	8	94.1	2.7	284	6	30	1	15.3	0.6	109	2	396	1	342	4	447	5	515.5	1	78.4	0.2	465	7	64.2	1.3	19.6	0.7	265		6.32		32.8			240	10
Ta	2.59	0.13	1.99	0.1	0.98	0.06	0.45	0.03	0.961	0.022	0.555	0.013	0.42	0.015	3.9	0.2	0.464	0.021	0.019	0.001	0.031	0.002	0.036	0.006	1.15	0.1	0.78	0.06	390	40	446	33	37.6	1.9	454	14	51.2	1.8	6.16	0.26	0.785	0.033	1.82	0.07	2	0.07
Tb	1.24	0.1	0.86	0.06	0.67	0.04	0.34	0.02	0.89	0.031	0.797	0.021	0.371	0.011	2.51	0.08	0.773	0.029	0.248	0.012	0.269	0.011	0.35	0.04	0.92	0.04	1.02	0.08	480	20	437	9	37.6	1.1	435	18	49	1.8	6.62	0.24	0.72	0.04	0.651	0.024	0.513	0.025
Te	0.086	0.12	1.19	2.2	0.11	0.16	0.11	0.16																							302
Th	20.4	1	72.2	2.7	12.3	0.6	7.5	0.28	1.02	0.03	0.548	0.011	2.28	0.07	7.4	0.27	31.3	1	0.008	0.001	0.009	0.003	0.03	0.002	1.22	0.05	5.9	0.3	380	20	457.2	1	37.79	0.08	12.4	0.3	13.1	0.3	3.28	0.11	9.31		19.5		15.18			105	8
Tl	0.096	0.012	0.083	0.004	0.216	0.006	0.028	0.008			0.008		0.11		0.07		0.13	0.08	0.003		0.001						0.3	0.1	2	0.2	59.6	2.8	14.9	0.5	35	4	0.14	0.07	3.57	0.35	0.285	0.016	0.882	0.134	0.661	0.07		1.1
Tm	0.29	0.02	0.37	0.02	0.35	0.02	0.13	0.01	0.331	0.009	0.324	0.007	0.172	0.007	1.52	0.07	0.354	0.015	0.204	0.009	0.234	0.009	0.24	0.03	0.34	0.02	0.51	0.04	500	20	435	10	36.8	0.6	423	15	49.5	1.4	6.47	0.21	0.407	0.016	0.377	0.012	0.33	0.014		0.29
U	3.47	0.13	14.1	0.9	2.66	0.08	1.76	0.03	0.548	0.016	0.442	0.018	1.01	0.04	2.37	0.12	1.71	0.1	0.0121	0.0012	0.048	0.005	0.023	0.006	0.403	0.003	1.69	0.12	420	30	461.5	1	37.38	0.08	12.5	0.5	13.4	0.4	3.75	0.13	2.53		6.35		6.37			2.4	0.2
V	144	4	200	11	86	2	98	3	309	38	268	23	90.3	6.7	3.91	0.34	190	11	189	13	214	17	326	32	308	19	425	18	440	20	450	9	38.8	1.2	575	19	55.8	2	12.2	1.1	84.5	1.7	0.363	0.3	0.857	0.102		52	4
W	1.5	0.3	1.47	0.19	2.27	0.19	0.58	0.05	0.37	0.06	0.35	0.09	0.47	0.18	9.3	1.2	0.69	0.12	15.5	2.4	25.4	3.4			0.23	0.04	0.5	0.07	430	50	444	29	38	1.1	454	23	55.9	2.3	9.12	0.37	1.91	0.06	1.96	0.06	2.16	0.06
Y	27.3	1.2	29	1.4	24.3	1.4	10.4	0.6	25.4	1.1	23.9	0.7	11.4	0.4	94.5	3.5	23.9	0.8	11.8	0.5	12.9	0.5	14.3	1.4	26	2	35	3	410	30	462	11	38.3	1.4	449	16	51.1	1	7.05	0.32	25.8	0.9	24.1	1	21.1	0.8		28	2
Yb	1.8	0.11	2.59	0.1	2.36	0.1	0.85	0.04	2.1	0.05	2.06	0.04	1.13	0.03	10.5	0.4	2.38	0.08	1.41	0.06	1.61	0.04	1.64	0.03	2.01	0.02	3.39	0.03	520	5	450	9	39.2	0.9	460	11	669	10	8.88	0.29	2.75	0.09	2.67	0.11	2.32	0.09		1.6	0.2
Zn	162	17	130	16	122	13	79	9	110	10	108	14	67	7	141	15	74	10	74.7	6.7	76.8	12.5	78	17	102	6	125	5	460	10	460	18	39.1	1.7	558	27	5120	290	36.1	3.1	242	10.5	42.3	1.9	34.4	1.4		120	10
Zr	546	36	1412	78	266	17	182	11	152	5	122	3	118	3	512	20	144	4	10	0.5	9.9	0.3	14	1.2	170	7	184	15	410	30	448	9	37.9	1.2	437	10	56.8	2.2	10.9	0.6	164	5	104	4	75.9	3.7		550	30
Trace element oxides	（10-6）	（10-6）	（10-6）	（10-6）	（10-6）	（10-6）	（10-6）	（10-6）	（10-6）	（10-6）	（10-6）	（10-6）	（10-6）	（10-6）	（10-6）	（10-6）	（10-6）	（10-6）	（10-6）	（10-6）	（10-6）	（10-6）	（10-6）	（10-6）	（10-6）	（10-6）	（10-6）	（10-6）	（10-6）	（10-6）	（10-6）	（10-6）	（10-6）	（10-6）	（10-6）	（10-6）	（10-6）	（10-6）	（10-6）	（10-6）	（10-6）	（10-6）	（10-6）	（10-6）	（10-6）	（10-6）	（10-6）	（10-6）	（10-6）
CO2																																																1400
F									177		70		320		0.7		321		25		22										304		80	89														3000
SO3									15.4		2.4		5.4		1.2		2.6		8.6		3.6										575	32	754	140														1500
Cl									26		7.5		231	50	430		113	37	12		6.2										274	67	142	58														400
Ag2O	0.945246	0.193346	1.09563	0.0365209	1.26749	0.279277	0.429657	0.0719676	0.161121		0.0322243		0.0214829		0.322243		0.107414		0.537071		0.0429657						0.537071	0.429657	214.829	21.4829	269.61	9.66728	23.6311	0.322243							0.090228	0.00537071	0.097747	0.0107414	0.0504847	0.007519
As2O3	4.35713	3.8686	7.68439	1.90129	3.04999	2.78592	3.81579	0.752595	0.224458		0.369696		3.60453	0.633764	1.84848	0.660171	1.26753	0.58095	0.132034		0.211255								343.289	118.831	429.111	23.7662	47.1362	7.26188	4436.35	238.982	4594.79	184.848	4990.89	224.458	4.91167	0.369696	23.37	17.8246	4.93808	0.620561
Au2O3	0.0224365		0.0673096		0.0560914		0.0224365		0.448731		0.0729188	0.0919898	0.0538477	0.0358985	0.0336548	0.0336548	0.112183	0.123401	0.0269239		0.123401	0.100964							7.85279		26.4751	1.90711	5.35112	0.347766
B2O3	120.756	11.7858	1977.18	653.694	5071.76	1668.05	15237.8	8613.95	8.79105	0.901647	8.05042	1.9321	37.998	4.18622	18.3549	1.61008	13.2027	3.54218	75.6739	9.01647	55.3869	8.37243					19.321	3.22017	1062.65	386.42	1127.06	180.329	110.452	5.47428	1490.94	167.449	33811.7	2479.53	195.142	11.9146	161.974	11.9146	114.316	7.7284	125.586	11.2706
BaO	2504.38	50.244	441.031	16.748	821.768	17.8645	1026.09	27.9133	137.334	5.58267	89.4343	2.45637	332.727	10.0488	610.744	17.8645	433.215	13.3984	1.18353	0.033496	0.909975	0.0692251	7.25747	0.0781573	146.266	2.23307	762.592	7.81573	476.76	5.58267	504.673	10.0488	43.8798	1.00488	2266.56	59.1763	278.017	5.58267	31.7095	0.558267	928.956	16.748	26.6851	0.893227	406.418	13.9567		1496.15	49.1275
Be2O	6.38044	0.50968	31.9022	3.64327	5.58761	0.415295	4.15295	0.471926	1.66118	0.64182	1.17038	0.264279	2.26525	0.188771	6.04066	0.64182	3.77541	1.13262	0.064182	0.0132139	0.151016		0.188771		2.45402	0.377541	4.34172	0.755082	924.976	151.016	898.548	58.5189	70.7889	2.83156	896.66	41.5295	103.257	2.83156	11.8737	0.64182	3.58664	0.113262	7.73959	0.188771	6.83349	0.302033		2.83156
Bi2O3	1.19287	0.144928	1.22632	0.211818	0.289856	0.033445	0.245263	0.0222967	0.040134	0.0156077	0.006689	0.0100335	0.122632	0.0780383	0.0557416		0.111483	0.0557416	0.00100335		0.00780383	0.0033445	0.0100335	0.00222967	0.0111483	0.00222967	0.0557416	0.0111483	356.746	33.445	428.096	28.9856	33.6679	2.56411	658.866	44.5933	77.9268	4.12488	15.4962	0.780383	0.0412488	0.0111483	0.211818	0.026756	0.306579	0.0167225
CdO	0.159929		0.107381		0.102811		0.0833915		0.102811		0.114235		0.114235		0.571174		0.22847	0	0.0822491		0.0913879		0.159929	0.045694	0.114235	0.022847	0.22847		182.776	57.1174	308.434	18.2776	32.1	1.25658	528.907	22.847	57.3459	2.51317	6.85409	0.52548	0.164498	0.0731103	0.309577	0.147363	0.626007	0.968712		0.22847	0.0571174
Ce2O3	408.786	17.5696	290.484	11.7131	85.5054	2.22548	62.4306	0.819914	37.9503	0.819914	27.0572	0.351392	30.5711	0.819914	141.728	4.68522	148.756	4.68522	0.527088	0.0187409	0.460323	0.0210835	2.21377	0.0468522	44.0411	0.234261	62.4306	0.585653	484.921	4.68522	530.602	9.37045	44.9782	0.819914	520.06	16.3983	62.8991	1.05418	9.33531	0.632505	70.1612	1.99122	56.2227	1.75696	44.7439	1.17131		480.236	35.1392
CoO	30.5162	2.54302	8.13765	1.65296	15.2581	0.635754	15.0038	0.508603	52.3862	2.92447	52.3862	4.45028	16.7839	1.39866	2.70831	0.597609	24.0315	1.01721	117.487	7.88335	117.869	7.2476	66.1184	6.35754	55.9464	2.54302	48.3173	2.54302	483.173	25.4302	521.319	12.7151	45.1386	1.27151	631.94	11.4436	75.7819	0.890056	9.47274	0.279732	17.0382	0.381453	0.171654		0.153853	0.0330592		9.28201	1.01721
Cr2O3	84.7692		46.7692		131.538		64.3077		429.692	39.4615	258.692	33.6154	24.7	4.82308	8.91538	2.04615	30.5462	2.92308	3320.62	249.923	3694.77	267.462	572.923	35.0769	428.231	17.5385	24.8462	2.92308	584.615	116.923	596.308	14.6154	53.2	2.19231	676.692	55.5385	89.1538	8.91538	13.2562	2.70385	110.492	4.82308	1.42208	0.876923	1.10054	0.495462		29.2308
Cs2O3	0.954176	0.0954176	1.98257	0.190835	4.77088	0.318059	1.42066	0.0954176	0.121922	0.00954176	0.148427	0.0127223	1.85534	0.116622	1.14501	0.116622	2.85193	0.201437	0.254447	0.0265049	7.89846	0.667923	0.00742137	0.00212039	0.10602	0.0212039	1.22983	0.0742137	328.661	21.2039	388.032	9.54176	45.2704	1.90835	502.533	20.1437	55.0242	1.80233	7.98327	0.233243	5.14195	0.127223	5.77807	0.10602	3.54105	0.190835		1.27223	0.10602
CuO	23.6585	0.500708	25.6613	1.50212	51.4478	2.87907	63.2144	2.25319	110.031	11.3911	140.198	12.5177	51.9485	10.3897	23.2829	2.75389	23.5333	2.50354	79.8629	15.6471	256.613	26.2872	148.961	15.0212	158.975	13.7695	26.2872	6.25885	475.673	50.0708	552.031	18.7766	47.3169	1.87766	558.29	23.7836	69.5984	3.88049	17.0241	1.00142	186.514	3.75531	2.99173	0.751062	1.11783	1.02019		53.8261	5.00708
Dy2O3	6.85172	0.332831	5.48597	0.218062	4.71702	0.206585	2.15766	0.0918154	5.99095	0.137723	5.55483	0.0803385	2.54788	0.0688615	18.5926	0.803385	5.16462	0.137723	2.27243	0.0803385	2.46754	0.0688615	2.92662	0.0229538	6.05982	0.0573846	7.39114	0.0688615	601.391	6.88615	501.542	12.6246	40.7431	0.803385	519.905	14.92	61.5163	1.492	7.09274	0.218062	5.29086	0.172154	4.55634	0.126246	3.83329	0.137723		7.00092
Er2O3	2.73286	0.194387	2.89294	0.182953	2.7786	0.12578	1.06341	0.0457382	2.90438	0.0800418	2.79003	0.0571727	1.34928	0.0457382	11.7776	0.571727	2.8472	0.0914764	1.60084	0.0686073	1.78379	0.0571727	1.94387	0.0228691	2.92724	0.0228691	4.23078	0.0457382	680.356	6.86073	520.272	16.0084	43.4513	1.02911	527.133	11.4345	60.3744	1.14345	7.1809	0.182953	3.16737	0.102911	2.8472	0.114345	2.44699	0.0914764		2.5156
Eu2O3	4.79368	0.127368	2.80211	0.0810526	1.41263	0.0578947	1.21579	0.0347368	2.22316	0.0463158	1.93368	0.0231579	1.10347	0.0254737	3.19579	0.115789	1.40105	0.0463158	0.305684	0.00926316	0.295263	0.00810526	0.598632	0.00578947	2.39684	0.0115789	2.28105	0.0231579	474.737	23.1579	517.579	13.8947	41.2211	0.926316	529.158	13.8947	58.7053	0.810526	6.61158	0.162105	1.23895	0.0463158	0.160947	0.00578947	0.390211	0.0254737		2.66316	0.115789
Ga2O3	36.2943	1.7475	49.7367	4.0327	24.1962	1.34423	24.7339	0.672117	26.8847	1.61308	26.347	2.82289	28.0945	3.62943	34.0091	3.22616	26.0781	1.20981	11.6545	1.43833	13.98	1.20981	20.1635	2.68847	29.5731	4.0327	30.9174	1.34423	658.675	94.0964	582.053	17.475	49.6022	2.01635	657.33	30.9174	93.962	3.89828	23.7929	0.537694	20.4324	0.80654	22.9864	0.80654	19.8947	0.940964		29.5731	2.68847
Gd2O3	13.0241	1.03732	7.80293	0.426453	5.25574	0.288144	3.10043	0.138309	6.82324	0.230515	6.06254	0.265092	2.98517	0.103732	17.6344	0.806802	6.12017	0.334247	1.34851	0.046103	1.37156	0.046103	2.13226	0.0230515	7.09986	0.0576287	7.73378	0.0806802	592.423	6.91545	517.506	13.8309	42.991	1.03732	514.048	14.9835	56.3609	0.92206	6.91545	0.16136	5.47473	0.207463	4.54114	0.149835	3.20416	0.115257		13.8309	2.30515
GeO2	2.01674	0.288106	2.01674	1.00837	1.87269	0.432159	1.44053	0.288106	1.87269	1.15242	1.58458	1.58458	1.58458	1.00837	2.59295	1.29648	2.59295	2.16079	1.38291		0.979559		1.72863	0.144053	2.30485	0.144053	2.16079	0.144053	460.969	115.242	643.916	112.361	52.0031	5.47401	901.771	46.0969	98.3881	6.77048	12.7343	1.13802	5.47401	2.67938	4.81137	2.36247	2.26163	0.0576211
HfO2	13.6796	1.65098	41.8641	3.8916	8.05443	0.56605	5.62513	0.306611	4.63454	0.165098	3.79725	0.0943417	3.62036	0.106134	16.156	0.589636	4.57557	0.176891	0.411566	0.0200476	0.421	0.0212269	0.672185	0.0353782	5.09445	0.212269	5.70768	0.330196	465.812	8.2549	512.983	14.1513	43.2793	1.41513	538.927	18.8683	60.7325	1.17927	7.32328	0.176891	5.41286	0.200476	5.23597	0.25944	3.66754	0.141513		16.5098	1.17927
Ho2O3	1.08827	0.0458217	0.996622	0.0343663	0.939345	0.0343663	0.389485	0.0229109	1.10087	0.0252019	1.03786	0.0206198	0.481128	0.012601	3.92921	0.12601	0.985167	0.0355118	0.507475	0.0217653	0.58079	0.0217653	0.641504	0.0343663	1.12263	0.0458217	1.45484	0.0916434	573.917	9.16434	514.349	13.7465	43.8743	0.916434	515.494	20.6198	57.9645	2.40564	8.21354	0.286386	1.08254	0.0423851	0.962256	0.0378029	0.809899	0.0320752		1.14554	0.114554
InO2	0.281324		0.524286		0.268537		0.179024		0.306899		0.255749		0.639373		0.217387		0.383624	0.511498	0.085676		0.115087		0.109972	0.0166237	0.127875	0.0255749	0.140662	0.0255749	473.136	76.7247	554.976	24.2962	49.7432	2.68537							0.0767247	0.00639373	0.075446	0.0153449	0.0383624	0.00895122
La2O3	192.337	5.86393	180.609	4.69114	47.4978	1.52462	35.6527	1.05551	15.3635	0.234557	10.5433	0.152462	14.0734	0.351836	65.2069	1.75918	82.5641	2.81469	0.141907	0.00469114	0.0987486	0.00340108	0.714227	0.0234557	17.8263	0.234557	28.9678	0.351836	459.732	4.69114	516.026	11.7279	42.2203	0.82095	530.099	12.9006	60.9849	1.29006	7.76384	0.175918	33.659	0.703672	27.2086	0.703672	24.0421	0.938229		211.102	14.0734
Li2O	51.6617	3.98226	884.707	69.0976	2410.88	147.882	4100.65	353.022	10.9781	1.07629	9.68657	0.861029	44.5582	4.95091	61.5635	3.87463	42.8362	1.93731	22.3867	3.65937	19.1579	2.58309	6.45772	1.5068	9.47132	1.72206	19.3731	2.15257	925.606	129.154	1007.4	51.6617	86.5334	2.79834	1099.96	45.204	2647.66	133.459	40.0378	2.15257	82.874	1.93731	96.22	2.15257	93.6369	2.58309		77.4926	2.15257
Lu2O3	0.284286	0.0227429	0.443486	0.0227429	0.409371	0.0227429	0.136457	0.0113714	0.324086	0.0102343	0.325223	0.00682286	0.19104	0.00682286	1.7512	0.0568571	0.402549	0.0136457	0.234251	0.0102343	0.269503	0.0102343	0.282011	0.0102343	0.317263	0.00341143	0.571983	0.00568571	589.04	6.82286	499.206	9.09714	42.0743	1.02343	507.166	14.7829	55.2651	1.70571	7.36869	0.216057	0.468503	0.0147829	0.446897	0.0204686	0.401411	0.0227429		0.261543
MoO3	4.20088	0.285059	1.38029	0.150031	2.8806	0.150031	1.33528	0.0750156	5.40113	0.900188	25.0552	3.45072	3.00063	0.900188	7.2015	1.50031	6.30131	2.70056	1.06522	0.390081	45.7595	3.90081	0.112523	0.0165034	5.70119	0.300063	405.084	45.0094	585.122	45.0094	625.63	31.5066	56.1117	2.25047	729.152	25.5053	85.8179	3.45072	14.238	0.405084	1.9354	0.0750156	3.94582	0.150031	9.43697	0.255053		3.15066	0.900188
Nb2O5	75.5317	2.57494	101.138	4.43462	20.8857	0.57221	14.7344	0.429157	21.4579	0.715262	12.3168	0.314715	9.92784	0.357631	89.2647	3.71936	12.6887	0.615125	0.141622	0.0100137	0.104428	0.0185968	0.743873	0.057221	26.1786	1.14442	17.8816	1.43052	600.82	57.221	665.194	48.6378	55.6474	3.0041	673.777	20.0273	82.5412	2.00273	17.4524	0.57221	16.1649	0.57221	29.898	1.00137	41.7713	1.71663		38.6242	2.86105
Nd2O3	153.969	5.83218	84.5666	3.14938	35.6929	1.51637	26.0115	0.816505	25.195	0.466574	19.4795	0.233287	15.1637	0.349931	71.0359	2.33287	48.2904	1.39972	0.914485	0.0548225	0.803674	0.0198294	2.76445	0.0349931	28.5777	0.233287	33.71	0.349931	528.395	5.83218	501.567	9.33148	41.4085	0.816505	513.232	18.663	64.7372	1.63301	8.78326	0.489903	30.9105		24.2619		14.6971	0		233.287	13.9972
NiO	47.2142	1.6544	5.345	0.636309	36.9059	1.90893	20.3619	0.636309	142.533	6.36309	136.17	11.4536	30.1611	4.83595	16.544	6.36309	13.4898	1.6544	1366.79	77.6297	1510.6	73.8119	226.526	22.9071	147.624	8.90833	16.544	2.54524	559.952	38.1786	583.75	5.09048	49.3776	0.254524	601.949	21.6345	75.339	2.41798	15.6532	1.78167	42.5055	0.509048	0.371605	0.254524	0.417419	0.217618		21.6345	2.54524
PbO	35.1174	1.40039	148.656	12.9266	50.6293	3.23166	22.4062	1.40039	2.22985	0.107722	1.48656	0.0754054	11.0954	0.969498	6.10784	0.667876	12.4958	1.61583	0.371641	0.0463205	21.0058	1.83127	3.98571	0.323166	1.83127	0.215444	11.8494	1.07722	407.189	12.9266	458.896	1.07722	41.5484	0.215444	661.413	36.6255	82.0842	3.66255	13.6807	0.646332	42.1193	0.969498	29.5158	0.646332	21.0058	0.430888		45.2432	3.23166
Pr2O3	41.3128	1.17033	25.8644	1.17033	9.32756	0.327693	6.57727	0.163847	5.38353	0.117033	4.01424	0.07022	3.74507	0.07022	17.0869	0.468133	14.5121	0.468133	0.117033	0.00468133	0.10416	0.00468133	0.433023	0.0234067	6.26128	0.257473	7.84123	0.468133	538.353	11.7033	524.309	8.19233	44.3556	1.17033	503.243	21.066	58.2826	1.87253	6.64749	0.24577	8.09871	0.28088	6.61238	0.187253	4.66963	0.21066		59.687	5.85167
Rb2O3	135.765	6.404	160.1	8.9656	108.868	5.1232	49.9512	2.5616	11.143	0.51232	7.42864	0.268968	39.3206	2.17736	83.6363	3.8424	102.08	4.4828	0.520005	0.03202	2.68968	0.12808	0.252318	0.0089656	11.7834	0.051232	60.1976	0.6404	455.965	5.1232	545.237	1.2808	40.2171	0.51232	622.469	26.8968	73.7741	3.45816	9.65723	0.435472	122.829		236.948		153.696			313.796	8.9656
Sb2O3	1.55616	0.239409	2.27438	0.359113	2.51379	0.239409	1.55616	0.119704	0.167586	0.0359113	0.131675	0.0598522	0.239409	0.0837931	0.383054	0.119704	0.299261	0.0598522	0.0119704	0.0251379	0.0718227	0.0478818	0.670345	0.107734	0.359113	0.155616	0.418966	0.0957635	538.67	131.675	474.03	22.7438	41.5374	2.15468	638.025	34.7143	74.935	4.42906	15.5616	0.957635	1.12043	0.0945665	1.02587	0.0646404	0.402207	0.05267		0.323202	0.0957635
Sc2O3	18.7125	0.766904	6.59537	1.38043	16.105	0.766904	13.4055	0.613523	48.7751	1.38043	48.4683	2.45409	17.6388	1.22705	7.66904	1.22705	41.2594	1.68719	49.2352	2.14733	55.984	1.84057	65.9537	4.60142	50.6157	3.06762	50.6157	3.06762	812.918	30.6762	697.883	15.3381	61.1989	3.83452	656.47	64.4199	78.9911	1.84057	10.7673	0.552171	19.326	0.460142	2.8989	0.490819	3.9879	0.383452		9.66299	1.07367
Sm2O3	20.9883	0.92766	11.1899	0.394255	6.29649	0.336277	4.19766	0.139149	6.42404	0.104362	5.50798	0.0811702	3.22362	0.0579787	16.466	0.46383	7.6184	0.16234	0.608777	0.0231915	0.589064	0.0173936	1.26394	0.0231915	7.0734	0.0347872	7.6416	0.0811702	565.872	5.79787	525.287	12.7553	43.716	0.92766	535.723	15.0745	59.834	1.15957	6.95745	0.115957	6.12255		5.14851		3.23521			31.3085	1.15957
SnO2	8.12536	2.28526	13.9655	2.53917	12.6959	1.26959	4.69747	0.888711	1.95516	0.36818	1.44733	0.418964	1.39655	0.253917	6.86847	0.926799	2.53917	0.634794	0.284388	0.116802	0.43166	0.114263	2.92005	1.65046	3.30093	0.761752	3.30093	0.507835	355.484	63.4794	545.922	36.818	49.0061	1.65046	751.596	31.7397	92.4259	3.55484	15.6159	1.39655	4.57051	0.622098	4.64669	0.672881	2.53917	0.114263		3.80876	0.634794
SrO	1557.49	37.8434	1419.13	48.4869	461.217	16.5565	940.172	36.6608	421.008	9.46085	368.973	4.73043	570.016	9.46085	111.283	3.19304	335.86	7.09564	35.4782	1.18261	18.0939	0.709564	128.904	2.36521	468.312	1.18261	404.451	4.73043	528.625	5.91303	609.634	1.18261	92.7164	0.236521	549.912	8.27825	75.9234	1.53739	23.1791	0.827825	313.391		7.47407		38.7895			283.826	11.8261
Ta2O5	3.16269	0.158745	2.43002	0.122112	1.19669	0.073267	0.549502	0.0366335	1.17349	0.0268646	0.67772	0.0158745	0.512869	0.0183167	4.76235	0.244223	0.566598	0.0256434	0.0232012	0.00122112	0.0378546	0.00244223	0.0439602	0.0073267	1.40428	0.122112	0.952471	0.073267	476.235	48.8447	544.618	40.2968	45.914	2.32012	554.387	17.0956	62.5212	2.19801	7.52208	0.31749	0.958577	0.0402968	2.22243	0.0854782	2.44223	0.0854782
Tb2O3	1.42729	0.115104	0.989893	0.0690623	0.771196	0.0460415	0.391353	0.0230208	1.02442	0.0356822	0.917378	0.0241718	0.427035	0.0126614	2.88911	0.0920831	0.889753	0.0333801	0.285458	0.0138125	0.309629	0.0126614	0.402863	0.0460415	1.05896	0.0460415	1.17406	0.0920831	552.498	23.0208	503.004	10.3593	43.279	1.26614	500.702	20.7187	56.4009	2.07187	7.61987	0.276249	0.828748	0.0460415	0.749326	0.0276249	0.590483	0.028776
TeO2	0.107567	0.150094	1.48843	2.75172	0.137586	0.200125	0.137586	0.200125																							377.737
ThO2	23.2138	1.13793	82.1586	3.07241	13.9966	0.682759	8.53448	0.318621	1.16069	0.0341379	0.623586	0.0125172	2.59448	0.0796552	8.42069	0.307241	35.6172	1.13793	0.00910345	0.00113793	0.0102414	0.00341379	0.0341379	0.00227586	1.38828	0.0568966	6.71379	0.341379	432.414	22.7586	520.262	1.13793	43.0024	0.0910345	14.1103	0.341379	14.9069	0.341379	3.73241	0.125172	10.5941		22.1897		17.2738			119.483	9.10345
Tl2O3	0.107272	0.013409	0.0927456	0.00446967	0.241362	0.0067045	0.0312877	0.00893933			0.00893933		0.122916		0.0782192		0.145264	0.0893933	0.00335225		0.00111742						0.335225	0.111742	2.23483	0.223483	66.598	3.12877	16.6495	0.558708	39.1096	4.46967	0.156438	0.0782192	3.98918	0.391096	0.318464	0.0178787	0.985562	0.149734	0.738613	0.0782192		1.22916
Tm2O3	0.331208	0.0228419	0.422575	0.0228419	0.399734	0.0228419	0.148472	0.011421	0.378034	0.0102789	0.370039	0.00799467	0.19644	0.00799467	1.73599	0.0799467	0.404302	0.0171314	0.232988	0.0102789	0.26725	0.0102789	0.274103	0.0342629	0.388313	0.0228419	0.582469	0.0456838	571.048	22.8419	496.812	11.421	42.0291	0.685258	483.107	17.1314	56.5337	1.59893	7.38936	0.23984	0.464833	0.0182735	0.43057	0.0137052	0.376892	0.0159893		0.331208
UO2	3.93655	0.147479	15.9958	1.02101	3.01765	0.0907563	1.99664	0.0340336	0.621681	0.0181513	0.501429	0.0204202	1.1458	0.0453782	2.68866	0.136134	1.93992	0.113445	0.0137269	0.00136134	0.0544538	0.00567227	0.0260924	0.00680672	0.457185	0.00340336	1.91723	0.136134	476.471	34.0336	523.55	1.13445	42.4059	0.0907563	14.1807	0.567227	15.2017	0.453782	4.2542	0.147479	2.87017		7.20378		7.22647			2.72269	0.226891
V2O5	257.074	7.14095	357.048	19.6376	153.53	3.57048	174.953	5.35571	551.638	67.839	478.444	41.0605	161.207	11.9611	6.98028	0.606981	339.195	19.6376	337.41	23.2081	382.041	30.349	581.987	57.1276	549.853	33.9195	758.726	32.1343	785.505	35.7048	803.357	16.0671	69.2672	2.14229	1026.51	33.9195	99.6163	3.57048	21.7799	1.96376	150.853	3.0349	0.648041	0.535571	1.52995	0.182094		92.8324	7.14095
WO3	1.89173	0.378346	1.8539	0.239619	2.86282	0.239619	0.731469	0.0630577	0.466627	0.0756692	0.441404	0.113504	0.592742	0.227008	11.7287	1.51338	0.870196	0.151338	19.5479	3.02677	32.0333	4.28792			0.290065	0.0504461	0.630577	0.0882807	542.296	63.0577	559.952	36.5734	47.9238	1.38727	572.564	29.0065	70.4985	2.90065	11.5017	0.466627	2.4088	0.0756692	2.47186	0.0756692	2.72409	0.0756692		0	0
Y2O3	34.6692	1.52392	36.8281	1.77791	30.8594	1.77791	13.2073	0.761962	32.2564	1.39693	30.3515	0.888955	14.4773	0.507974	120.009	4.44478	30.3515	1.01595	14.9852	0.634968	16.3822	0.634968	18.1601	1.77791	33.0183	2.53987	44.4478	3.80981	520.674	38.0981	586.71	13.9693	48.6385	1.77791	570.201	20.319	64.8937	1.26994	8.95305	0.406379	32.7643	1.14294	30.6055	1.26994	26.7956	1.01595		35.5582	2.53987
Yb2O3	2.04971	0.12526	2.94931	0.113873	2.6874	0.113873	0.967919	0.0455491	2.39133	0.0569364	2.34578	0.0455491	1.28676	0.0341618	11.9566	0.455491	2.71017	0.0910983	1.60561	0.0683237	1.83335	0.0455491	1.86751	0.0341618	2.28884	0.0227746	3.86029	0.0341618	592.139	5.69364	512.428	10.2486	44.6382	1.02486	523.815	12.526	761.809	11.3873	10.1119	0.330231	3.1315	0.102486	3.0404	0.12526	2.64185	0.102486		1.82197	0.227746
ZnO	201.627	21.1584	161.799	19.9138	151.843	16.1799	98.3243	11.2015	136.907	12.4461	134.418	17.4246	83.3889	8.71228	175.49	18.6692	92.1012	12.4461	92.9724	8.33889	95.5861	15.5576	97.0797	21.1584	126.95	7.46767	155.576	6.22305	572.521	12.4461	572.521	22.403	48.6643	2.11584	694.493	33.6045	6372.41	360.937	44.9305	3.85829	301.196	13.0684	52.647	2.36476	42.8146	1.74246		149.353	12.4461
ZrO2	737.537	48.6288	1907.33	105.362	359.313	22.9636	245.846	14.8588	205.322	6.754	164.798	4.0524	159.394	4.0524	691.61	27.016	194.515	5.4032	13.508	0.6754	13.3729	0.40524	18.9112	1.62096	229.636	9.4556	248.547	20.262	553.828	40.524	605.159	12.1572	51.1953	1.62096	590.3	13.508	76.7255	2.97176	14.7237	0.81048	221.531	6.754	140.483	5.4032	102.526	4.99796		742.94	40.524
Sum2	6879.05		8564.8		10185.6		22306.6		2701.76		2171.93		2290.67		2956.17		2591.03		5620.52		6406.02		1989.53		2624.82		3304.12		25437.9		28051.2		3317.1		33029.2		51143.8		5748.78		2990.74		1025.79		1252.37			10925.8
[truncated: 1 more columns]
