# Supplementary material for: Analysis of geological glasses by electron probe microanalysis under low beam current density conditions
Source: Royal Society of Chemistry journal article supplement (doi:10.1039/d3ja00183k), 2023-01-01
Supplement: d3ja00183k6.xlsx [file d3ja00183k6.xlsx]

## Sheet: EPMA
Provider	NRCG										MPI
Sample name	CGSG-1 analysis 1		CGSG-1 analysis 2		CGSG-2		CGSG-4		CGSG-5		KL2-G								ML3B-G								StHs6/80-G										ATHO-G										T1-G
Lithology	Alkali basalt from Tibet				Syenite		Soil from Beijing		Andesite		Kilauea tholeiitic basalt								Mauna Loa tholeiitic basalt								St. Helens andesitic ash										Iceland rhyolite										Italian Alps quartz diorite
	Value	SD	Value	SD	Value	SD	Value	SD	Value	SD	Value	SD	Value	SD	Value	SD	Value	SD	Value	SD	Value	SD	Value	SD	Value	SD	Value	SD	Value	SD	Value	SD	Value	SD	Value	SD	Value	SD	Value	SD	Value	SD	Value	SD	Value	SD	Value	SD	Value
	（%）	（%）	（%）	（%）	（%）	（%）	（%）	（%）	（%）	（%）	（%）	（%）	（%）	（%）	（%）	（%）	（%）	（%）	（%）	（%）	（%）	（%）	（%）	（%）	（%）	（%）	（%）	（%）	（%）	（%）	（%）	（%）	（%）	（%）	（%）	（%）	（%）	（%）	（%）	（%）	（%）	（%）	（%）	（%）	（%）	（%）	（%）	（%）	（%）
SiO2	52.6	0.3	52.5	0.2	54	0.2	63.2	0.4	57.1	0.1	49.7	0.497	50	0.5	50	0.5	50.1	0.501	50.8	0.508	51.1	0.511	51.4	0.514	51.9	0.519	63.1	0.631	63.3	0.633	63.7	0.637	65	0.65	64	0.64	74.9	0.749	75.6	0.756	75.9	0.759	76.7	0.767	78.1	0.781	58.7	0.587	57.7
TiO2	2.22	0.01	2.16	0.02	0.58	0.01	0.6	0.01	0.48	0.01	2.61	0.1044	2.6	0.052	2.58	0.0516			2.1	0.042	2.1	0.063	2.08	0.0416			0.71	0.0071	0.694	0.0347	0.678	0.01356					0.25	0.02	0.242	0.02662	0.228	0.01596			0.25	0.01	0.71	0.0355	0.792
Al2O3	17.7	0.1	17.6	0.1	21	0.1	14.9	0.1	15.9	0.1	12.9	0.129	13	0.13	13.3	0.133	13.3	0.133	13.4	0.134	13	0.26	13.7	0.137	13.7	0.137	17.2	0.172	17.4	0.174	18.2	0.182	17.9	0.179	17.7	0.177	11.9	0.119	11.9	0.119	12.3	0.123	12.1	0.121	12.3	0.123	16.8	0.168
FeO(t)	7.94	0.03	7.78	0.11	6.78	0.08	4.57	0.08	4.43	0.07	10.7	0.321	10.7	0.214	10.5	0.105	10.7	0.214	10.8	0.216	11	0.22	10.7	0.107	11	0.22	4.41	0.1323	4.31	0.1293	4.22	0.1266	4.44	0.0888	4.47	0.0894	3.55	0.2485	3.23	0.0969	3.24	0.0324	3.59	0.2154	3.03	0.0606	6.46	0.1938	6.47
Fe2O3(t)	8.82406	0.0333403	8.64625	0.122248	7.53491	0.0889074	5.07884	0.0889074	4.92325	0.077794	11.8914	0.356741	11.8914	0.237827	11.6691	0.116691	11.8914	0.237827	12.0025	0.24005	12.2248	0.244495	11.8914	0.118914	12.2248	0.244495	4.90102	0.147031	4.78989	0.143697	4.68987	0.140696	4.93436	0.0986873	4.9677	0.0993541	3.94527	0.276169	3.58964	0.107689	3.60075	0.0360075	3.98972	0.239383	3.36737	0.0673474	7.17928	0.215378	7.19039
MnO	0.12	0.01	0.12	0.02	0.13	0.02	0.11	0.02	0.09	0.02	0.21	0.0399	0.18	0.036	0.16	0.016			0.23	0.0184	0.17	0.0425	0.147	0.0294			0.096	0.0192	0.078	0.0078	0.078	0.0234			0.07	0.021	0.13	0.0325	0.108	0.0378	0.106	0.0318			0.09	0.018	0.12	0.048	0.13
MgO	3.84	0.02	3.85	0.04	0.82	0.02	2.05	0.02	1.48	0.02	7.06	0.1412	7.24	0.0724	7.29	0.0729	7.38	0.0738	6.54	0.0654	6.52	0.0652	6.52	0.0652	6.64	0.0664	1.9	0.038	1.96	0.0392	1.96	0.0392	2.02	0.0404	2.01	0.0201	0.086	0.00946	0.1	0.01	0.082	0.0246	0.098	0.0098	0.1	0.01	3.64	0.0728	3.76
CaO	5.96	0.02	5.94	0.04	1.69	0.02	7.09	0.05	4.75	0.04	10.9	0.109	11	0.11	11	0.11	11.1	0.111	10.4	0.104	10.5	0.105	10.4	0.104	10.6	0.106	5.22	0.0522	5.31	0.1062	5.39	0.1078	5.5	0.11	5.12	0.0512	1.61	0.0322	1.72	0.0516	1.67	0.0334	1.74	0.0348	1.53	0.0459	6.88	0.0688	7.05
Na2O	4.02	0.04	3.78	0.08	6.69	0.08	2.8	0.07	12	0.12	2.16	0.0216	2.33	0.0466	2.39	0.0956			2.29	0.0458	2.37	0.0474	2.39	0.0956			4.17	0.0834	4.47	0.0894	4.6	0.092			4.57	0.2285	2.7	0.81	3.37	0.0674	3.64	0.1456			2.84	0.1152	3.06	0.0612
K2O	3.94	0.01	3.91	0.05	6.94	0.06	2.58	0.04	1.91	0.03	0.44	0.0176	0.482	0.02892					0.39	0.0156	0.383	0.02298					1.34	0.0268	1.29	0.0258					1.29	0.0387	2.82	0.0846	2.68	0.0536					2.13	0.0426	2.05	0.0205	1.93
P2O5	1.18	0.02	1.09	0.03	0.08	0.01	0.25	0.02	0.2	0.02	0.26	0.0182							0.24	0.0144							0.06	0.009									0.03	0.015									0.18	0.0126
H2O
Source of data	MPI, Mainz,Germany; Hu et al.,2011										Universität Mainz,Germany;Jochum et al.,2000		Universität Heidelberg,Germany;Jochum et al.,2000		Universität zu Köln,Germany;Jochum et al., 2000		GeoForschungs Zentrum, Potsdam, Germany;Jochum et al., 2000		Universität Mainz,Germany;Jochum et al.,2000		Universität Heidelberg,Germany;Jochum et al.,2000		Universität zu Köln,Germany;Jochum et al., 2000		GeoForschungs Zentrum, Potsdam, Germany;Jochum et al., 2000		Universität Mainz,Germany;Jochum et al.,2000		Universität Heidelberg,Germany;Jochum et al.,2000		Universität zu Köln,Germany;Jochum et al., 2000		GeoForschungs Zentrum, Potsdam, Germany;Jochum et al., 2000		American Museum of National History,New York,USA;Jochum et al., 2000		Universität Mainz,Germany;Jochum et al.,2000		Universität Heidelberg,Germany;Jochum et al.,2000		Universität zu Köln,Germany;Jochum et al., 2000		GeoForschungs Zentrum, Potsdam, Germany;Jochum et al., 2000		American Museum of National History,New York,USA;Jochum et al., 2000		Universität Mainz,Germany;Jochum et al.,2000		Universität Heidelberg,Germany;Jochum et al.,2000
Beam Condition	15kV,12nA,10mm										15kV,12nA		15kV,20nA,10um		15kV,15nA,10mm		15kV,20nA,10mm		15kV,12nA		15kV,20nA,10um		15kV,15nA,10mm		15kV,20nA,10mm		15kV,12nA		15kV,20nA,10um		15kV,15nA,10mm		15kV,20nA,10mm		Unknown		15kV,12nA		15kV,20nA,10um		15kV,15nA,10mm		15kV,20nA,10mm		Unknown		15kV,12nA		15kV,20nA,10um
Instrument Model	JXA-8200										Camebax Microbeam		CAMECA SX51		JXA 8900		CAMECA SX-100		Camebax Microbeam		CAMECA SX51		JXA 8900		CAMECA SX-100		Camebax Microbeam		CAMECA SX51		JXA 8900		CAMECA SX-100		CAMECA SX-100		Camebax Microbeam		CAMECA SX51		JXA 8900		CAMECA SX-100		CAMECA SX-100		Camebax Microbeam		CAMECA SX51
Peak counting time	30s for Na and 60s for the other major elements										Unknown		10s for each of the element		Unknown		10s for each of the element		Unknown		10s for each of the element		Unknown		10s for each of the element		Unknown		10s for each of the element		Unknown		10s for each of the element		Unknown		Unknown		10s for each of the element		Unknown		10s for each of the element		Unknown		Unknown		10s for each of the element
Data Reduction	ZAF										ZAF		ZAF		ZAF		ZAF		ZAF		ZAF		ZAF		ZAF		ZAF		ZAF		ZAF		ZAF		ZAF		ZAF		ZAF		ZAF		ZAF		ZAF		ZAF		ZAF
	Sets of reference materials, i.e.,natural and synthetic oxides, minerals and glasses (MicroAnalysis Consultants Ltd., Cambridge, UK; Smithsonian Institution reference set for electron probe microanalysis; Jarosewich 2002) were used for calibration and instrument stability monitoring. As quality control samples, we used the United States National Museum, Washington, DC (USNM) 111240 ⁄ 52 VG2 basal…
	_x0002_
[truncated: 82 more columns]
