# Supplementary material for: Analysis of geological glasses by electron probe microanalysis under low beam current density conditions
Source: Royal Society of Chemistry journal article supplement (doi:10.1039/d3ja00183k), 2023-01-01
Supplement: d3ja00183k7.xlsx [file d3ja00183k7.xlsx]

## Sheet: Sheet1
	SiO2	TiO2	Al2O3	FeO	Fe2O3	MnO	MgO	CaO	Na2O	K2O	P2O5	Trace oxide total	Sum	H2O content by EPMA-difference method
	(%)	(%)	(%)	(%)	(%)	(%)	(%)	(%)	(%)	(%)	(%)	(%)	(%)	(%)
CGSG-1 1	52.7249	1.988	17.2055	7.8469	8.7206	0.176	3.938	5.75148	3.655	4.046	1.196	0.6879	100.089	-0.0894242
CGSG-1 2	52.8484	2.154	17.2427	8.006	8.89741	0.113	3.924	5.951	3.71978	3.96	1.299	0.6879	100.797	-0.797137
CGSG-1 3	53.1914	2.07	17.4715	7.491	8.32507	0.356	3.956	5.863	3.977	3.993	1.017	0.6879	100.908	-0.907913
CGSG-1 4	52.7315	2.1973	17.5127	7.823	8.69404	0.17	3.901	5.845	3.916	4.065	1.058	0.6879	100.778	-0.778442
CGSG-1 5	52.4608	2.222	17.3983	7.682	8.53734	0.119	3.912	5.901	3.796	4.036	1.152	0.6879	100.222	-0.222277
CGSG-1 6	52.5721	2.168	17.1112	7.526	8.36397	0.121	3.864	5.843	3.82966	3.978	1.132	0.6879	99.6708	0.329177
CGSG-1 7	52.391	2.236	17.325	7.908	8.7885	0.172	3.828	5.891	3.898	3.934	1.265	0.6879	100.416	-0.416345
CGSG-1 8	52.7047	2.187	17.2628	7.464	8.29506	0.191	3.789	5.864	3.822	3.994	1.057	0.6879	99.8544	0.145615
CGSG-1 9	52.4952	2.314	17.2848	7.8148	8.68492	0.132	4.083	5.77353	3.652	3.938	1.265	0.6879	100.31	-0.310385
CGSG-1 10	52.649	2.215	17.5247	7.452	8.28173	0.073	3.941	5.80662	3.902	3.967	1.208	0.6879	100.256	-0.255976
Average	52.6769	2.17513	17.3339	7.70137	8.55886	0.1623	3.9136	5.84896	3.81674	3.9911	1.1649	0.6879	100.33	-0.330311
2SD	0.45871	0.181324	0.277608	0.410013	0.455666	0.154327	0.159753	0.119902	0.223839	0.0901921	0.196685		0.815632	0.815632
GeoReM preferred value	52.7	2.19	17.4	7.77	8.63514	0.123	3.92	5.86	3.8	3.93	1.15	0.6879	100.396	-0.396036
2SE	0.2	0.06	0.2	0.12	0.133361	0.002	0.06	0.1	0.12	0.06	0.07
CGSG-2 1	53.916	0.5757	20.671	6.938	7.7105	0.249	0.823	1.699	6.60239	6.89126	0.043	0.8565	100.037	-0.0373525
CGSG-2 2	54.001	0.5	20.684	6.358	7.06592	0.228	0.78	1.676	6.68396	6.90194	0.136	0.8565	99.5133	0.486678
CGSG-2 3	53.868	0.576	20.687	6.443	7.16038	0.236	0.809	1.723	6.43502	6.9699	0.119	0.8565	99.4398	0.560191
CGSG-2 4	53.7866	0.652	20.815	6.73	7.47934	0.247	0.896	1.7161	6.2589	6.88544	0.138	0.8565	99.7309	0.269128
CGSG-2 5	53.932	0.661	20.713	6.917	7.68716	0.262	0.819	1.658	6.63476	6.88252	0.058	0.8565	100.164	-0.163948
CGSG-2 6	54.307	0.588	20.618	6.562	7.29263	0.181	0.837	1.664	6.53342	6.8301	0.062	0.8565	99.7696	0.230352
CGSG-2 7	54.073	0.616	20.625	6.565	7.29597	0.162	0.903	1.667	6.57081	6.88544	0.04	0.8565	99.6947	0.305288
CGSG-2 8	54.454	0.592	20.795	6.686	7.43044	0.126	0.828	1.702	6.65838	6.85437	0.1197	0.8565	100.416	-0.416388
CGSG-2 9	54.249	0.514	20.721	6.598	7.33264	0.114	0.833	1.69	6.56195	6.81456	0.12096	0.8565	99.8076	0.192383
CGSG-2 10	54.311	0.534	20.57	6.559	7.2893	0.161	0.855	1.694	6.65444	6.85534	0.15372	0.8565	99.9343	0.065698
Average	54.0898	0.58087	20.6899	6.6356	7.37443	0.1966	0.8383	1.68891	6.5594	6.87709	0.099038	0.8565	99.8508	0.149203
2SD	0.451414	0.107802	0.152541	0.373525	0.415115	0.108764	0.0754073	0.0443438	0.256868	0.0861751	0.0865692		0.592444	0.592444
GeoReM preferred value	54.2	0.589	20.8	6.77	7.52379	0.127	0.856	1.68	6.51	6.75	0.087	0.8565	99.9793	0.0207074
2SE	0.2	0.019	0.2	0.1	0.111134	0.004	0.041	0.04	0.23	0.32	0.013
CGSG-4 1	64.317	0.609	14.806	4.46	4.95659	0.116	2.128	6.764	2.827	2.551	0.238	1.0186	100.331	-0.33119
CGSG-4 2	64.344	0.529	14.812	4.537	5.04216	0.032	2.129	6.838	2.832	2.711	0.186	1.0186	100.474	-0.473764
CGSG-4 3	64.612	0.65	14.663	4.6398	5.15641	0.237	2.072	6.947	2.832	2.564	0.307	1.0186	101.059	-1.05901
CGSG-4 4	64.377	0.62	14.702	4.53	5.03438	0.066	2.041	6.921	2.778	2.594	0.206	1.0186	100.358	-0.357984
CGSG-4 5	63.921	0.583	14.759	4.574	5.08328	0.202	2.13	6.923	2.744	2.627	0.333	1.0186	100.324	-0.323883
CGSG-4 6	63.607	0.643	14.85	4.524	5.02772	0.123	2.124	6.822	2.794	2.591	0.2142	1.0186	99.8145	0.185484
CGSG-4 7	63.875	0.58	14.882	4.434	4.9277	0.101	2.142	6.849	2.81	2.644	0.20664	1.0186	100.036	-0.0359352
CGSG-4 8	64.125	0.629	14.865	4.687	5.20886	0.102	2.139	6.832	2.871	2.622	0.26838	1.0186	100.681	-0.680845
CGSG-4 9	63.856	0.598	14.88	4.581	5.09106	0.09	2.134	6.853	2.789	2.576	0.27594	1.0186	100.162	-0.161603
CGSG-4 10	63.828	0.577	14.765	4.499	4.99993	0.149	2.09	6.827	2.842	2.63	0.20916	1.0186	99.9357	0.0643075
Average	64.0862	0.6018	14.7984	4.54658	5.05281	0.1218	2.1129	6.8576	2.8119	2.611	0.244432	1.0186	100.317	-0.317442
2SD	0.633668	0.0727296	0.150971	0.154424	0.171618	0.122005	0.0674715	0.112326	0.0731601	0.0932142	0.0985322		0.733483	0.733483
GeoReM preferred value	63.1	0.609	14.7	4.58	5.08995	0.107	2.11	6.95	2.74	2.6	0.257	1.0186	99.2816	0.718449
2SE	1.1	0.026	0.2	0.09	0.100021	0.003	0.04	0.13	0.17	0.05	0.014
CGSG-5 1	57.0535	0.541	15.217	4.49	4.98993	0.181	1.559	4.605	11.1671	1.938	0.218	2.2307	99.7003	0.299721
CGSG-5 2	56.6373	0.602	15.289	4.5293	5.03361	0.022	1.576	4.708	11.0197	1.977	0.257	2.2307	99.3523	0.647731
CGSG-5 3	56.9414	0.541	15.279	4.39	4.8788	0.038	1.443	4.673	10.9624	1.958	0.228	2.2307	99.1733	0.826736
CGSG-5 4	57.0314	0.436	15.31	4.419	4.91103	0.099	1.556	4.573	11.1962	1.98	0.166	2.2307	99.4893	0.510691
CGSG-5 5	56.6716	0.562	15.281	4.462	4.95881	0.11	1.582	4.69	10.9886	1.959	0.174	2.2307	99.2077	0.792307
CGSG-5 6	57.0596	0.491	15.534	4.414	4.90547	0.037	1.442	4.724	11.2118	1.918	0.217	2.2307	99.7705	0.229507
CGSG-5 7	56.5688	0.45	15.442	4.57	5.07884	0.144	1.573	4.696	11.1351	1.984	0.207	2.2307	99.5094	0.490574
CGSG-5 8	57.0374	0.527	15.443	4.519	5.02216	0.15	1.449	4.671	11.2554	1.985	0.164	2.2307	99.9347	0.0653276
CGSG-5 9	57.0183	0.47	15.631	4.39	4.8788	0.155	1.583	4.499	11.1157	1.952	0.221	2.2307	99.7545	0.245549
CGSG-5 10	56.5396	0.491	15.525	4.422	4.91436	0.081	1.488	4.59	11.0119	1.906	0.149	2.2307	98.9265	1.07349
Average	56.8559	0.5111	15.3951	4.46053	4.95718	0.1017	1.5251	4.6429	11.1064	1.9557	0.2001	2.2307	99.4818	0.518164
2SD	0.443317	0.104912	0.27731	0.127062	0.141209	0.112254	0.123635	0.145108	0.207673	0.0555302	0.0694899		0.634836	0.634836
GeoReM preferred value	56.3	0.497	15.5	4.46	4.95659	0.0883	1.49	4.67	11.3	1.92	0.204	2.2307	99.1566	0.84341
2SE	1.1	0.024	0.3	0.09	0.100021	0.0034	0.07	0.13	0.7	0.04	0.015
KL-2G 1	50.029	2.588	13.36	11.0216	12.2487	0.146	7.475	10.9213	2.444	0.516	0.268	0.2702	100.266	-0.266237
KL-2G 2	49.902	2.734	13.461	10.9269	12.1435	0.175	7.323	10.9312	2.398	0.469	0.231	0.2702	100.038	-0.0378482
KL-2G 3	49.8	2.628	13.445	10.915	12.1303	0.173	7.397	10.8276	2.317	0.474	0.272	0.2702	99.7341	0.265879
KL-2G 4	49.996	2.497	13.341	11.0383	12.2674	0.199	7.448	10.9351	2.313	0.477	0.292	0.2702	100.036	-0.0356846
KL-2G 5	49.681	2.556	13.566	11.1991	12.4461	0.124	7.334	10.8976	2.299	0.484	0.246	0.2702	99.9039	0.0960884
KL-2G 6	49.4186	2.581	13.395	10.971	12.1925	0.184	7.382	10.8621	2.2184	0.479	0.304	0.2702	99.2868	0.713191
KL-2G 7	50.292	2.477	13.337	10.9407	12.1588	0.154	7.293	10.8256	2.3168	0.464	0.30618	0.2702	99.8946	0.105366
KL-2G 8	50.276	2.527	13.513	11.1557	12.3979	0.198	7.432	10.7556	2.248	0.478	0.2709	0.2702	100.367	-0.366531
KL-2G 9	49.979	2.606	13.515	10.8223	12.0273	0.144	7.341	10.8878	2.262	0.483	0.26082	0.2702	99.7761	0.223949
KL-2G 10	50.104	2.711	13.414	10.8144	12.0185	0.121	7.37	10.9243	2.31	0.475	0.2646	0.2702	99.9826	0.0174437
Average	49.9478	2.5905	13.4347	10.9805	12.2031	0.1618	7.3795	10.8768	2.31262	0.4799	0.27155	0.2702	99.9284	0.0715616
2SD	0.53152	0.168262	0.158501	0.253867	0.282133	0.0565984	0.117754	0.117551	0.13399	0.0280705	0.0478154		0.598831	0.598831
GeoReM preferred value	50.3	2.56	13.3	10.7	11.8914	0.165	7.34	10.9	2.35	0.48	0.232	0.2702	99.7886	0.211429
95%CL	0.3	0.09	0.2	0.1	0.111134	0.009	0.09	0.2	0.08	0.01	0.026
ML3B-G 1	50.945	2.13	13.9344	10.908	12.1225	0.251	6.40965	10.559	2.49	0.385	0.22	0.2172	99.6638	0.336232
ML3B-G 2	51.352	2.201	13.7889	10.923	12.1392	0.238	6.45936	10.541	2.307	0.388	0.316	0.2172	99.9476	0.0523802
ML3B-G 3	50.957	2.073	13.7017	11.277	12.5326	0.188	6.39406	10.589	2.351	0.402	0.189	0.2172	99.5946	0.405375
ML3B-G 4	51.099	2.05	13.5958	11.299	12.5571	0.142	6.55194	10.588	2.333	0.383	0.253	0.2172	99.77	0.229971
ML3B-G 5	50.834	2.111	13.5394	11.214	12.4626	0.179	6.49054	10.493	2.375	0.376	0.231	0.2172	99.3087	0.691258
ML3B-G 6	50.952	2.012	13.5146	10.855	12.0636	0.121	6.5724	10.545	2.394	0.388	0.243	0.2172	99.0229	0.977116
ML3B-G 7	50.906	2.119	13.7512	11.049	12.2792	0.139	6.56948	10.618	2.432	0.378	0.228	0.2172	99.6372	0.362844
ML3B-G 8	50.946	1.977	13.6433	11.028	12.2559	0.123	6.46228	10.52	2.333	0.403	0.22	0.2172	99.1007	0.899287
ML3B-G 9	51.488	2.202	13.5483	11.273	12.5282	0.195	6.40381	10.526	2.352	0.388	0.27216	0.2172	100.121	-0.120645
ML3B-G 10	51.143	2.139	13.7483	11.119	12.357	0.116	6.41355	10.404	2.402	0.383	0.24066	0.2172	99.5637	0.436289
Average	51.0622	2.1014	13.6766	11.0945	12.3298	0.1692	6.47271	10.5383	2.3769	0.3874	0.241282	0.2172	99.573	0.427011
2SD	0.421687	0.148459	0.266282	0.333278	0.370386	0.0977061	0.140784	0.120089	0.109107	0.0178935	0.0686319		0.695222	0.695222
GeoReM preferred value	51.4	2.13	13.6	10.9	12.1136	0.17	6.59	10.5	2.4	0.385	0.23	0.2172	99.7358	0.26416
95%CL	0.6	0.09	0.2	0.1	0.111134	0.009	0.08	0.1	0.06	0.004	0.025
StHs6/80-G 1	62.639	0.689	17.6006	4.65538	5.17372	0.108	1.967	5.1827	4.47388	1.29126	0.252	0.2291	99.6063	0.393694
StHs6/80-G 2	62.518	0.709	17.6452	4.27129	4.74687	0.034	2.027	5.10252	4.64708	1.34272	0.14	0.2291	99.1415	0.858536
StHs6/80-G 3	62.858	0.721	17.6284	4.58841	5.0993	0.064	1.895	5.12696	4.60312	1.35534	0.128	0.2291	99.7082	0.291824
StHs6/80-G 4	62.541	0.674	17.4542	4.61008	5.12338	0.071	1.944	5.10936	4.50152	1.31165	0.206	0.2291	99.1652	0.834838
StHs6/80-G 5	62.772	0.756	17.569	4.63076	5.14636	0.08	1.973	5.24431	4.41556	1.32136	0.161	0.2291	99.6677	0.332348
StHs6/80-G 6	63.031	0.686	17.5927	4.36583	4.85194	0.074	1.912	5.1739	4.60898	1.33689	0.16254	0.2291	99.6591	0.340923
StHs6/80-G 7	62.517	0.693	17.4878	4.72333	5.24924	0.099	1.948	5.10838	4.54841	1.29223	0.18774	0.2291	99.3599	0.640081
StHs6/80-G 8	62.862	0.764	17.5066	4.72924	5.25581	0.117	2.004	5.24431	4.56404	1.30388	0.13734	0.2291	99.9881	0.0119034
StHs6/80-G 9	62.72	0.713	17.665	4.48697	4.98656	0.095	1.96	5.22084	4.50641	1.29029	0.16254	0.2291	99.5487	0.451281
StHs6/80-G 10	62.775	0.694	17.5096	4.42985	4.92308	0.111	2.008	5.17977	4.51227	1.34369	0.20286	0.2291	99.4883	0.511652
Average	62.7233	0.7099	17.5659	4.54911	5.05563	0.0853	1.9638	5.16931	4.53813	1.31893	0.174002	0.2291	99.5333	0.466708
2SD	0.341346	0.0597063	0.144857	0.309036	0.343445	0.0512428	0.0836171	0.111105	0.139935	0.0490395	0.0765283		0.515537	0.515537
GeoReM preferred value	63.7	0.703	17.8	4.37	4.85657	0.076	1.97	5.28	4.44	1.29	0.164	0.2291	100.509	-0.508669
95%CL	0.5	0.021	0.2	0.07	0.077794	0.004	0.04	0.09	0.14	0.02	0.018
ATHO-G 1	74.442	0.243	12.127	3.31	3.67855	0.18	0.088	1.704	4.0338	2.7068	0.055	0.2956	99.5537	0.446258
ATHO-G 2	74.261	0.173	11.948	3.394	3.7719	0.15	0.121	1.71	4.198	2.67573	0.029	0.2956	99.3332	0.666773
ATHO-G 3	74.744	0.223	12.079	3.62	4.02306	0.205	0.092	1.609	4.113	2.67282	0.051	0.2956	100.107	-0.107477
ATHO-G 4	74.469	0.315	11.924	3.191	3.5463	0.084	0.142	1.694	4.1388	2.7767	0	0.2956	99.3854	0.614605
ATHO-G 5	74.292	0.259	11.989	3.241	3.60186	0.161	0.091	1.617	4.2368	2.77282	0.058	0.2956	99.3741	0.625922
ATHO-G 6	74.413	0.183	11.906	3.301	3.66854	0.119	0.074	1.651	4.247	2.65534	0.047	0.2956	99.2595	0.740517
ATHO-G 7	74.305	0.183	12.042	3.112	3.4585	0.061	0.11	1.634	4.069	2.67184	0.068	0.2956	98.8979	1.10206
ATHO-G 8	74.255	0.264	11.908	3.387	3.76412	0.047	0.078	1.687	4.02	2.71748	0.014	0.2956	99.0502	0.949805
ATHO-G 9	74.673	0.325	11.876	3.183	3.53741	0.116	0.123	1.647	4.272	2.69126	0.041	0.2956	99.5973	0.402733
ATHO-G 10	74.825	0.226	11.975	3.269	3.63298	0.037	0.097	1.703	4.015	2.62913	0.04284	0.2956	99.4785	0.521453
Average	74.4679	0.2394	11.9774	3.3008	3.66832	0.116	0.1016	1.6656	4.13434	2.69699	0.040584	0.2956	99.4037	0.596264
2SD	0.419054	0.105965	0.164558	0.286167	0.318029	0.115966	0.0435451	0.0766881	0.198171	0.0958255	0.0416635		0.656123	0.656123
GeoReM preferred value	75.6	0.255	12.2	3.27	3.63409	0.106	0.103	1.7	3.75	2.64	0.025	0.2956	100.309	-0.308692
95%CL	0.7	0.016	0.2	0.1	0.111134	0.005	0.01	0.03	0.31	0.09	0.004
T1-G 1	58.3564	0.709	16.745	6.675	7.41822	0.114	3.76	6.916	3.11442	1.96893	0.225	0.259	99.5859	0.414063
T1-G 2	58.679	0.776	16.816	6.512	7.23707	0.095	3.698	6.931	3.12026	2.02524	0.177	0.259	99.8135	0.186461
T1-G 3	58.8106	0.858	17.15	6.383	7.0937	0.192	3.592	6.931	2.98782	1.99126	0.207	0.259	100.072	-0.072361
T1-G 4	58.6176	0.777	16.866	6.487	7.20928	0.005	3.602	6.896	3.07741	2.0233	0.203	0.259	99.5356	0.464389
T1-G 5	58.8304	0.642	17.173	6.666	7.40821	0.13	3.682	6.989	3.30335	2.01748	0.142	0.259	100.576	-0.576408
T1-G 6	58.9204	0.719	17.068	6.822	7.58158	0.184	3.804	6.916	3.14363	2.0932	0.103	0.259	100.792	-0.791842
T1-G 7	58.7472	0.786	17.187	6.345	7.05147	0.078	3.608	7.031	3.25271	2.00388	0.186	0.259	100.19	-0.190311
T1-G 8	58.3376	0.801	17.061	6.128	6.81031	0.141	3.764	6.964	3.15435	2.02233	0.189	0.259	99.5036	0.496443
T1-G 9	58.5414	0.674	16.993	6.541	7.2693	0.138	3.516	7.06	3.01995	2.01748	0.244	0.259	99.7321	0.267856
T1-G 10	58.9175	0.689	16.988	6.224	6.917	0.184	3.706	6.897	3.12903	1.97476	0.188	0.259	99.8492	0.150764
Average	58.6758	0.7431	17.0047	6.4783	7.19961	0.1261	3.6732	6.9531	3.13029	2.01379	0.1864	0.259	99.9651	0.0349055
2SD	0.423365	0.133821	0.307356	0.427616	0.475228	0.11454	0.182917	0.113609	0.190105	0.0691849	0.0803669		0.882254	0.882254
GeoReM preferred value	58.6	0.755	17.1	6.44	7.15705	0.127	3.75	7.1	3.13	1.96	0.168	0.259	100.106	-0.106049
95%CL	0.4	0.017	0.2	0.06	0.0666806	0.006	0.04	0.09	0.09	0.04	0.026
GOR128-G 1	46.292	0.198	9.877	9.77395	10.8622	0.21	25.6147	6.16269	0.618	0.025	0.092	0.5621	100.514	-0.513707
GOR128-G 2	46.148	0.36	10.052	9.72515	10.808	0.246	25.5519	6.18244	0.58	0.045	0.054	0.5621	100.589	-0.589395
GOR128-G 3	46.092	0.243	9.907	9.8185	10.9117	0.175	25.6176	6.17948	0.656	0.032	0.043	0.5621	100.419	-0.418945
GOR128-G 4	46.114	0.228	9.946	9.66209	10.7379	0.299	25.8293	6.13602	0.55	0.055	0.052	0.5621	100.509	-0.509359
GOR128-G 5	46.257	0.303	9.749	10.0531	11.1725	0.272	25.6725	6.19232	0.57	0.038	0.074	0.5621	100.862	-0.862415
GOR128-G 6	46.358	0.399	9.904	9.68882	10.7676	0.183	25.5686	6.14491	0.576	0.031	0.032	0.5621	100.526	-0.526249
GOR128-G 7	45.789	0.288	9.84	9.9769	11.0878	0.312	25.5351	6.02739	0.487	0.05	0.045	0.5621	100.023	-0.0233603
GOR128-G 8	46.307	0.223	10.06	10.0224	11.1384	0.124	25.4221	6.12714	0.631	0.036	0.039	0.5621	100.67	-0.669713
GOR128-G 9	45.942	0.202	10.16	10.0046	11.1186	0.21	25.6392	6.11331	0.549	0.024	0	0.5621	100.52	-0.520174
GOR128-G 10	45.929	0.253	9.93	9.95512	11.0636	0.189	25.6284	6.11726	0.603	0.045	0.062	0.5621	100.382	-0.382333
Average	46.1228	0.2697	9.9425	9.86807	10.9668	0.222	25.608	6.1383	0.582	0.0381	0.0493	0.5621	100.502	-0.501565
2SD	0.376662	0.134911	0.238749	0.299957	0.333355	0.118914	0.210026	0.0959155	0.0964619	0.0209221	0.0495226		0.430548	0.430548
GeoReM preferred value	46.1	0.288	9.91	9.81	10.9023	0.176	26	6.24	0.574	0.036	0.025	0.5621	100.813	-0.813376
95%CL	0.4	0.012	0.17	0.12	0.133361	0.009	0.3	0.12	0.026	0.005	0.005
GOR132-G 1	45.499	0.304	11.133	10.52	11.6913	0.216	22.1989	8.53127	0.729	0.026	0.058	0.6406	101.027	-1.02713
GOR132-G 2	45.735	0.228	11.069	9.753	10.8389	0.221	22.2485	8.33507	0.809	0.059	0.055	0.6406	100.239	-0.239054
GOR132-G 3	45.567	0.263	11.051	10.181	11.3146	0.191	22.1336	8.40211	0.872	0.04	0	0.6406	100.475	-0.47486
GOR132-G 4	45.232	0.324	11.236	10.0752	11.197	0.167	22.2613	8.42972	0.837	0.027	0.039	0.6406	100.391	-0.390654
GOR132-G 5	45.54	0.263	10.909	10.524	11.6958	0.097	21.9335	8.43366	0.847	0.02	0.013	0.6406	100.393	-0.39253
GOR132-G 6	45.159	0.37	11.095	10.488	11.6558	0.14	22.197	8.43366	0.795	0.031	0.063	0.6406	100.58	-0.579981
GOR132-G 7	45.396	0.284	11.089	10.346	11.498	0.137	22.3029	8.40704	0.781	0.037	0.017	0.6406	100.59	-0.589528
GOR132-G 8	45.717	0.268	10.935	10.144	11.2735	0.221	22.2712	8.37155	0.836	0.034	0.108	0.6406	100.676	-0.675849
GOR132-G 9	45.486	0.193	11.103	10.037	11.1546	0.175	22.4644	8.44549	0.78	0.031	0.042	0.6406	100.515	-0.515017
GOR132-G 10	45.616	0.238	11.181	10.468	11.6335	0.221	22.502	8.36169	0.886	0.033	0.028	0.6406	101.341	-1.34084
Average	45.4947	0.2735	11.0801	10.2536	11.3953	0.1786	22.2513	8.41513	0.8172	0.0338	0.0423	0.6406	100.623	-0.622544
2SD	0.377534	0.101027	0.199342	0.516466	0.573971	0.0868521	0.3211	0.108954	0.0952274	0.0210565	0.0620254		0.657436	0.657436
GeoReM preferred value	45.5	0.306	11	10.1	11.2246	0.154	22.4	8.45	0.83	0.0308	0.036	0.6406	100.572	-0.571965
95%CL	0.4	0.013	0.2	0.1	0.111134	0.007	0.2	0.12	0.04	0.0034	0.012
BIR-1G 1	47.678	0.898	15.718	10.247	11.3879	0.199	9.25646	13.24	1.964	0.016	0	0.199	100.556	-0.556388
BIR-1G 2	47.795	1.053	15.993	10.348	11.5002	0.149	9.27199	13.175	1.825	0.041	0.02	0.199	101.022	-1.02216
BIR-1G 3	47.584	1.021	15.564	9.976	11.0868	0.161	9.30111	13.112	1.818	0.025	0.022	0.199	99.8939	0.106135
BIR-1G 4	47.505	0.975	15.48	10.284	11.4291	0.193	9.30984	13.144	1.843	0.033	0.008	0.199	100.119	-0.118895
BIR-1G 5	47.833	1.005	15.483	10.252	11.3935	0.132	9.47389	13.394	1.78	0.024	0	0.199	100.717	-0.717378
BIR-1G 6	47.548	0.884	15.562	10.76	11.9581	0.168	9.33508	13.198	1.812	0.026	0.04158	0.199	100.732	-0.731712
BIR-1G 7	47.684	0.939	15.669	10.3769	11.5323	0.187	9.35644	13.392	1.825	0.027	0	0.199	100.811	-0.810732
BIR-1G 8	47.554	0.972	15.591	9.9892	11.1014	0.141	9.27102	13.272	1.782	0.035	0	0.199	99.9184	0.0815564
BIR-1G 9	47.663	0.848	15.502	10.316	11.4646	0.123	9.34576	13.159	1.81	0.038	0.02772	0.199	100.18	-0.180093
BIR-1G 10	47.457	0.964	15.725	10.317	11.4657	0.148	9.44865	13.13	1.933	0.017	0.0945	0.199	100.582	-0.581877
Average	47.6301	0.9559	15.6287	10.2866	11.432	0.1601	9.33702	13.2216	1.8392	0.0282	0.02138	0.199	100.453	-0.453155
2SD	0.24487	0.128611	0.31343	0.434875	0.483295	0.0524209	0.147206	0.205165	0.122219	0.0168338	0.0588954		0.791982	0.791982
GeoReM preferred value	47.5	1.04	15.5	10.4	11.558	0.19	9.4	13.3	1.85	0.03	0.027	0.199	100.594	-0.593968
SD	0.3	0.07	0.2	0.1	0.111134	0.01	0.1	0.2	0.07	0.005	0.003
BHVO-2G 1	49.7986	2.7994	13.64	11.3798	12.6469	0.152	7.073	11.26	2.373	0.528	0.22	0.2625	100.753	-0.75336
BHVO-2G 2	49.5042	2.757	13.626	11.2667	12.5212	0.126	7.1	11.525	2.384	0.51	0.38	0.2625	100.696	-0.695828
BHVO-2G 3	49.6889	2.75	13.7593	11.2839	12.5403	0.216	7.116	11.328	2.325	0.522	0.268	0.2625	100.776	-0.776008
BHVO-2G 4	49.7308	2.737	13.579	11.1766	12.421	0.166	7.086	11.254	2.383	0.531	0.294	0.2625	100.444	-0.444355
BHVO-2G 5	49.764	2.569	13.622	11.287	12.5437	0.176	7.209	11.323	2.306	0.517	0.32	0.2625	100.612	-0.612245
BHVO-2G 6	49.4182	2.675	13.59	11.3745	12.641	0.111	7.137	11.458	2.332	0.526	0.298	0.2625	100.449	-0.448671
BHVO-2G 7	49.2404	2.863	13.672	11.37	12.636	0.211	7.201	11.394	2.386	0.501	0.25452	0.2625	100.621	-0.621341
BHVO-2G 8	49.7047	2.674	13.568	11.183	12.4281	0.146	7.359	11.417	2.409	0.519	0.22176	0.2625	100.709	-0.709143
BHVO-2G 9	49.4587	2.85	13.528	11.393	12.6615	0.154	7.257	11.329	2.373	0.52	0.23814	0.2625	100.632	-0.631881
BHVO-2G 10	49.6899	2.829	13.641	11.197	12.4437	0.136	7.315	11.379	2.411	0.502	0.25326	0.2625	100.862	-0.862381
Average	49.5998	2.75034	13.6225	11.2912	12.5483	0.1594	7.1853	11.3667	2.3682	0.5176	0.274768	0.2625	100.656	-0.655521
2SD	0.366342	0.183581	0.127671	0.170941	0.189974	0.0681645	0.199807	0.170927	0.0710981	0.0206817	0.0991042		0.268625	0.268625
GeoReM preferred value	49.3	2.79	13.6	11.3	12.5582	0.17	7.13	11.4	2.4	0.51	0.29	0.2625	100.411	-0.410677
SD	0.1	0.02	0.1	0.1	0.111134	0.03	0.02	0.1	0.1	0.02	0.02
BCR-2G 1	54.475	2.191	13.3836	12.715	14.1307	0.188	3.564	7.04605	3.13261	1.72136	0.454	0.3304	100.617	-0.616738
BCR-2G 2	55.134	2.155	13.3826	12.1809	13.5372	0.209	3.639	6.94352	3.32436	1.78252	0.385	0.3304	100.823	-0.822563
BCR-2G 3	54.483	2.488	13.7618	12.763	14.1841	0.259	3.656	7.02141	3.19033	1.79223	0.395	0.3304	101.561	-1.56125
BCR-2G 4	54.354	2.241	13.5325	12.577	13.9774	0.162	3.486	7.01648	3.23924	1.78544	0.32	0.3304	100.444	-0.444417
BCR-2G 5	54.906	2.275	13.5692	12.726	14.143	0.125	3.68	6.97211	3.08173	1.76699	0.374	0.3304	101.223	-1.22342
BCR-2G 6	54.782	2.238	13.6993	12.523	13.9173	0.2	3.628	6.98197	3.10815	1.77184	0.403	0.3304	101.06	-1.05998
BCR-2G 7	54.178	2.245	13.5623	12.4162	13.7987	0.203	3.642	6.98592	3.25294	1.77864	0.29358	0.3304	100.27	-0.270412
BCR-2G 8	54.222	2.342	13.7142	12.447	13.8329	0.164	3.652	7.01352	3.15804	1.75049	0.34776	0.3304	100.527	-0.527256
BCR-2G 9	54.741	2.332	13.7132	12.3899	13.7694	0.179	3.658	6.92085	3.2187	1.78641	0.28476	0.3304	100.934	-0.933712
BCR-2G 10	54.843	2.262	13.6963	12.2853	13.6532	0.161	3.66	6.95141	3.21087	1.77864	0.3843	0.3304	100.931	-0.931099
Average	54.6118	2.2769	13.6015	12.5023	13.8944	0.185	3.6265	6.98532	3.1917	1.77146	0.36414	0.3304	100.839	-0.839085
2SD	0.632544	0.186334	0.276606	0.390298	0.433755	0.072394	0.116509	0.0788712	0.146676	0.0424054	0.105351		0.777903	0.777903
GeoReM preferred value	54.4	2.27	13.4	12.4	13.7807	0.19	3.56	7.06	3.23	1.74	0.37	0.3304	100.331	-0.331054
SD	0.4	0.04	0.4	0.3	0.333403	0.01	0.09	0.11	0.07	0.04	0.01
GSE-1G 1	53.149	0.16	13.088	12.95	14.3919	0	3.652	7.097	3.96932	2.674	0	2.5438	100.725	-0.725011
GSE-1G 2	53.114	0.091	13.025	12.8421	14.272	0.083	3.50451	7.00632	3.83678	2.726	0	2.5438	100.202	-0.202437
GSE-1G 3	52.97	0.11	13.039	12.399	13.7795	0.076	3.628	7.257	3.75165	2.58	0.007	2.5438	99.742	0.258008
GSE-1G 4	52.983	0.092	12.931	12.343	13.7173	0.096	3.508	7.137	3.84259	2.576	0	2.5438	99.4267	0.573306
GSE-1G 5	52.8512	0.042	12.831	12.417	13.7995	0.109	3.653	7.21	3.78841	2.631	0	2.5438	99.459	0.541042
GSE-1G 6	52.897	0.101	13.09	12.397	13.7773	0.117	3.58	7.174	3.98093	2.597	0	2.5438	99.858	0.141953
GSE-1G 7	53.03	0.042	13.114	12.307	13.6773	0.04	3.699	7.146	3.92578	2.647	0.01008	2.5438	99.875	0.125036
GSE-1G 8	53.684	0.072	13.071	12.5114	13.9045	0.071	3.636	7.236	3.82421	2.604	0	2.5438	100.646	-0.646463
GSE-1G 9	53.633	0.109	13.172	12.569	13.9685	0.093	3.584	7.099	3.86097	2.65	0.02142	2.5438	100.735	-0.734659
GSE-1G 10	52.96	0.111	13.082	12.364	13.7406	0.099	3.544	7.175	3.85613	2.597	0.05292	2.5438	99.7615	0.238504
Average	53.1271	0.093	13.0443	12.51	13.9029	0.0784	3.59885	7.15373	3.86368	2.6282	0.009142	2.5438	100.043	-0.0430721
2SD	0.58825	0.0701427	0.195542	0.437951	0.486713	0.070163	0.131242	0.14869	0.148729	0.0944683	0.0338243		1.00805	1.00805
GeoReM preferred value	53.7	0.075	13	12.7	14.1141		3.5	7.4	3.9	2.6		2.5438	100.833	-0.832857
SD	1.5	0.007	0.4	0.3	0.333403		0.03	0.3	0.2	0.1
NIST610 1	69.137	0.083	1.83356	0.069	0.0766827	0	0.064	11.0765	13.0923	0.075	0.122	2.805	98.3651	1.63493
NIST610 2	68.717	0.062	1.85502	0.113	0.125582	0.076	0.108	11.033	13.3758	0.075	0.084	2.805	98.3165	1.68354
NIST610 3	68.851	0.119	1.9325	0.051	0.0566785	0.101	0.075	11.1497	13.0474	0.06	0.079	2.805	98.2762	1.72381
NIST610 4	68.695	0.124	1.81014	0	0	0	0.068	11.1714	13.1014	0.035	0.117	2.805	97.927	2.07305
NIST610 5	68.743	0.098	1.82087	0	0	0.109	0.044	11.1437	13.0376	0.069	0.061	2.805	97.9312	2.06883
NIST610 6	68.583	0.052	1.80038	0.094	0.104466	0.128	0.051	11.1991	13.0953	0.061	0.083	2.805	97.9622	2.03782
NIST610 7	68.956	0.176	1.80331	0.058	0.0644579	0.142	0.091	11.1101	13.0757	0.069	0.057	2.805	98.3496	1.65041
NIST610 8	68.496	0	1.86088	0.071	0.0789054	0.109	0.096	11.1823	13.1265	0.05	0.05	2.805	97.8546	2.1454
NIST610 9	69.1	0.072	1.93992	0.149	0.16559	0.136	0.108	11.0627	12.9958	0.042	0.17	2.805	98.597	1.40298
NIST610 10	68.51	0	1.89991	0.015	0.0166701	0.09	0.081	11.1012	13.2302	0.085	0.075	2.805	97.894	2.10603
Average	68.7788	0.0786	1.85565	0.062	0.0689033	0.0891	0.0786	11.123	13.1178	0.0621	0.0898	2.805	98.1473	1.85268
2SD	0.457423	0.10946	0.104475	0.0974292	0.108277	0.102187	0.0446637	0.110195	0.219856	0.0315728	0.0733745		0.522897	0.522897
GeoReM preferred value	69.7		1.95					11.4	13.4			2.805	99.255	0.745
SD	0.5		0.04					0.2	0.3
NIST 612 1	71.271	0.005	1.936	0.036	0.0400084	0	0	11.704	13.3352	0.022	0.083	0.3317	98.7279	1.2721
NIST 612 2	70.873	0	1.852	0.005	0.00555672	0	0.012	11.5103	13.254	0.028	0.053	0.3317	97.9196	2.08039
NIST 612 3	70.987	0	1.996	0	0	0	0.009	11.7504	13.2746	0.018	0	0.3317	98.3667	1.6333
NIST 612 4	71.384	0	1.947	0.14	0.155588	0.035	0.01	11.6595	13.4711	0.005	0	0.3317	98.999	1.00105
NIST 612 5	70.932	0.026	2.015	0	0	0.03	0	11.6259	13.2482	0.028	0.054	0.3317	98.2908	1.7092
NIST 612 6	71.296	0	1.98	0.075	0.0833507	0	0	11.6832	13.3205	0.033	0.016	0.3317	98.7438	1.25617
NIST 612 7	70.945	0	2.002	0.017	0.0188928	0.093	0.019	11.5765	13.5034	0.003	0.036	0.3317	98.5285	1.47147
NIST 612 8	71.021	0	2.003	0.084	0.0933528	0.016	0.001	11.5736	13.1181	0.011	0	0.3317	98.1687	1.83128
NIST 612 9	71.056	0	2.046	0.079	0.0877961	0.016	0.026	11.5449	13.3939	0.033	0.038	0.3317	98.5733	1.42672
NIST 612 10	70.925	0	2.037	0.099	0.110023	0.005	0.006	11.6645	13.3812	0.014	0.016	0.3317	98.4904	1.50964
Average	71.069	0.0031	1.9814	0.0535	0.0594569	0.0195	0.0083	11.6293	13.33	0.0195	0.0296	0.3317	98.4809	1.51913
2SD	0.36151	0.0163965	0.114481	0.0973208	0.108157	0.0577677	0.0177651	0.152741	0.228276	0.0221359	0.0561917		0.622215	0.622215
GeoReM preferred value	72.1		2.03					11.9	13.7			0.3317	100.062	-0.0617
95%CL	0.6		0.04					0.1	0.3
ARM-1 1	59.212	0.932	13.3631	6.03141	6.70297	0.09	3.769	5.064	4.42559	3.16408	0.355	3.3029	100.381	-0.380663
ARM-1 2	58.9572	1.058	13.2748	5.66525	6.29604	0.079	3.7953	5.066	4.3433	3.24175	0.239	3.3029	99.6533	0.346693
ARM-1 3	58.845	1.035	13.3542	5.99138	6.65848	0.014	3.703	4.864	4.27082	3.14369	0.245	3.3029	99.4361	0.563921
ARM-1 4	59.2949	1.038	13.1359	6.07633	6.75289	0	3.658	5.125	4.35114	3.19417	0.188	3.3029	100.041	-0.0408518
ARM-1 5	58.4881	1.079	13.4287	5.6467	6.27542	0.087	3.794	5.009	4.31588	3.22718	0.271	3.3029	99.2781	0.72188
ARM-1 6	58.8298	1.022	13.0972	5.80879	6.45556	0.054	3.793	4.982	4.43734	3.13495	0.271	3.3029	99.3797	0.620284
ARM-1 7	58.9178	1.09	13.0644	5.46508	6.07358	0	3.656	5.104	4.25025	3.12718	0.257	3.3029	98.8431	1.15691
ARM-1 8	58.7934	0.992	13.2321	5.90253	6.55973	0	3.808	5.037	4.18952	3.10485	0.345	3.3029	99.3646	0.635448
ARM-1 9	58.8531	1.017	13.1478	5.76582	6.40781	0.092	3.681	5.024	4.4442	3.1165	0.196	3.3029	99.2823	0.717749
ARM-1 10	58.8824	1.105	13.4108	5.64963	6.27868	0.09	3.807	4.943	4.41775	3.04854	0.19	3.3029	99.476	0.523956
Average	58.9074	1.0368	13.2509	5.80029	6.44612	0.0506	3.74643	5.0218	4.34458	3.15029	0.2557	3.3029	99.5135	0.486532
2SD	0.446127	0.101801	0.269687	0.397062	0.441272	0.084281	0.128156	0.155257	0.176001	0.116931	0.117685		0.857756	0.857756
GeoReM preferred value	58.4	0.98	13.3	5.72	6.35688	0.04	3.78	5.07	4.43	3.13	0.26	3.3029	99.0498	0.950218
2SE	0.5	0.03	0.1	0.1	0.111134	0.01	0.11	0.06	0.04	0.02	0.01
ARM-2 1	57.9903	1.123	13.124	5.8	6.44579	0.068	3.774	4.901	4.341	3.074	0.234	5.1144	100.19	-0.189539
ARM-2 2	58.3975	0.9	13.091	5.367	5.96458	0	3.617	4.918	4.391	3.081	0.222	5.1144	99.6965	0.303488
ARM-2 3	57.807	1.089	13.167	6.04	6.71251	0.03	3.653	5.041	4.316	2.991	0.294	5.1144	100.215	-0.214927
ARM-2 4	58.3823	0.893	13.266	6.112	6.79253	0.051	3.703	4.924	4.434	2.965	0.264	5.1144	100.789	-0.789269
ARM-2 5	58.1524	0.909	13.144	6.146	6.83031	0.133	3.644	5.089	4.412	2.974	0.255	5.1144	100.657	-0.657127
ARM-2 6	58.4269	1.047	13.024	5.873	6.52692	0	3.669	4.991	4.426	3.052	0.283	5.1144	100.56	-0.560226
ARM-2 7	58.2345	1.139	13.164	6.049	6.72251	0	3.7	5.009	4.407	3.055	0.275	5.1144	100.82	-0.820372
ARM-2 8	58.0876	0.9	12.835	5.681	6.31354	0.019	3.708	4.952	4.424	3.04	0.232	5.1144	99.6255	0.374473
ARM-2 9	57.9073	1.118	13.053	5.81	6.4569	0.024	3.702	4.945	4.295	3.011	0.236	5.1144	99.8626	0.137405
ARM-2 10	57.8435	1.18	13.094	5.738	6.37689	0.06	3.677	5.074	4.417	2.999	0.305	5.1144	100.141	-0.140766
Average	58.1229	1.0298	13.0962	5.8616	6.51425	0.0385	3.6847	4.9844	4.3863	3.0242	0.26	5.1144	100.256	-0.255686
2SD	0.467443	0.232621	0.227875	0.475926	0.528918	0.0830756	0.0867592	0.134059	0.100346	0.0833029	0.0575654		0.879651	0.879651
GeoReM preferred value	57.9	0.97	13.1	5.72	6.35688	0.05	3.74	5.01	4.42	3	0.29	5.1144	99.9513	0.0487176
2SE	0.5	0.04	0.1	0.1	0.111134	0.01	0.1	0.07	0.05	0.05	0.01
ARM-3 1	60.948	1.113	13.936	6.09375	6.77225	0.125	3.495	5.351	4.7282	3.17184	0.269	0.5749	100.484	-0.484198
ARM-3 2	60.488	1.053	13.985	5.84819	6.49935	0	3.451	5.307	4.41221	3.17184	0.227	0.5749	99.1693	0.830692
ARM-3 3	60.666	0.981	13.797	5.89338	6.54956	0.07	3.417	5.266	4.61736	3.17379	0.368	0.5749	99.4806	0.519386
ARM-3 4	60.963	1.048	14.052	5.94052	6.60196	0.003	3.524	5.333	4.59014	3.1699	0.284	0.5749	100.144	-0.143903
ARM-3 5	60.58	1.108	13.923	6.32065	7.02441	0.179	3.373	5.373	4.61639	3.1932	0.327	0.5749	100.272	-0.271903
ARM-3 6	60.45	1.207	13.875	6.06232	6.73732	0.06	3.513	5.241	4.58431	3.20777	0.286	0.5749	99.7363	0.263709
ARM-3 7	60.998	0.914	13.9	5.89534	6.55175	0.022	3.476	5.265	4.49097	3.21165	0.294	0.5749	99.6983	0.301735
ARM-3 8	60.954	1.083	13.92	6.2018	6.89232	0.087	3.485	5.298	4.61736	3.23398	0.345	0.5749	100.491	-0.490569
ARM-3 9	60.485	1.068	13.906	6.28627	6.9862	0.114	3.555	5.366	4.5318	3.22039	0.224	0.5749	100.031	-0.0312928
ARM-3 10	60.732	1.078	13.981	6.246	6.94145	0.089	3.614	5.284	4.45208	3.19806	0.325	0.5749	100.269	-0.26948
Average	60.7264	1.0653	13.9275	6.07882	6.75566	0.0749	3.4903	5.3084	4.56408	3.19524	0.2949	0.5749	99.9776	0.0224177
2SD	0.445856	0.156501	0.137957	0.356183	0.395842	0.113617	0.13674	0.0915069	0.186709	0.0460362	0.0949781		0.88411	0.88411
GeoReM preferred value	60.3	1.01	13.8	5.91	6.56804	0.05	3.51	5.32	4.66	3.18	0.27	0.5749	99.2429	0.757062
2SE	0.08	0.03	0.1	0.09	0.100021	0.01	0.08	0.04	0.05	0.04	0.02
OJY-1 1	58.8357	0.654	11.329	5.36866	5.96642	0.16	6.19324	11.961	1.4942	2.53689	0.128	0.2991	99.5575	0.442453
OJY-1 2	59.1773	0.618	11.465	5.3795	5.97847	0.079	6.20966	11.6351	1.41249	2.64854	0.01	0.2991	99.5326	0.467364
OJY-1 3	59.2609	0.778	11.365	5.40254	6.00408	0.166	6.31299	11.9155	1.37455	2.67282	0.079	0.2991	100.228	-0.227968
OJY-1 4	59.0221	0.696	11.635	5.65912	6.28922	0.109	6.32748	11.7635	1.3872	2.59417	0.096	0.2991	100.219	-0.218756
OJY-1 5	58.8196	0.597	11.55	5.40254	6.00408	0.244	6.3352	11.8701	1.50101	2.59126	0.135	0.2991	99.9464	0.0536166
OJY-1 6	59.6014	0.593	11.629	5.5439	6.16118	0.044	6.06093	11.8741	1.3979	2.59417	0.134	0.2991	100.389	-0.388775
OJY-1 7	59.001	0.602	11.242	5.65912	6.28922	0.144	6.40956	11.88	1.4621	2.63495	0.141	0.2991	100.105	-0.104886
OJY-1 8	59.3355	0.624	11.388	5.43256	6.03744	0.182	5.94698	11.6706	1.42319	2.73107	0.122	0.2991	99.7599	0.240129
OJY-1 9	59.4422	0.597	11.587	5.46741	6.07617	0.269	6.20193	11.6914	1.50782	2.67087	0.045	0.2991	100.388	-0.38753
OJY-1 10	58.9153	0.711	11.597	5.53906	6.1558	0.109	6.08121	11.7852	1.35218	2.56699	0.134	0.2991	99.7068	0.293205
Average	59.1411	0.647	11.4787	5.48544	6.09621	0.1506	6.20792	11.8046	1.43126	2.62417	0.1024	0.2991	99.9831	0.0168852
2SD	0.532247	0.124754	0.280956	0.21944	0.243873	0.139918	0.289212	0.224216	0.112709	0.116341	0.0894686		0.65659	0.65659
GeoReM preferred value	59.1	0.62	11.4	5.37	5.96791	0.121	6.38	11.9	1.46	2.61	0.11	0.2991	99.968	0.0319877
2SE	0.3	0.011	0.04	0.07	0.077794	0.003	0.05	0.1	0.03	0.04	0.007
OH-1 1	76.1755	0.057	12.6278	1.092	1.21359	0.019	0.017	0.526	3.85211	4.61942	0.056	0.1026	99.266	0.734035
OH-1 2	75.9935	0.015	12.6109	0.94	1.04466	0	0.04	0.532	3.87361	4.51068	0	0.1026	98.7229	1.27709
OH-1 3	76.7007	0.036	12.5425	0.934	1.03799	0	0.02	0.522	3.85895	4.6767	0.037	0.1026	99.5345	0.465521
OH-1 4	75.8798	0.129	12.7269	0.92	1.02244	0	0.022	0.557	3.9088	4.65437	0	0.1026	99.0028	0.997153
OH-1 5	76.0084	0.093	12.5693	0.831	0.923526	0	0.037	0.544	3.93617	4.74272	0.065	0.1026	99.0217	0.978345
OH-1 6	76.1486	0.093	12.4374	1	1.11134	0.011	0.032	0.563	3.94887	4.54854	0	0.1026	98.9964	1.00358
OH-1 7	75.7945	0.031	12.5395	1.139	1.26582	0.035	0.042	0.554	3.81203	4.69417	0.057	0.1026	98.9277	1.07235
OH-1 8	75.7298	0.17	12.8052	0.914	1.01577	0.055	0.024	0.545	3.9694	4.61553	0	0.1026	99.0323	0.96765
OH-1 9	76.4471	0.129	12.6664	1.091	1.21248	0.008	0.034	0.525	3.9782	4.63689	0.016	0.1026	99.7557	0.244346
OH-1 10	75.9348	0.072	12.5187	1.068	1.18691	0.18	0.025	0.518	3.94496	4.6165	0.032	0.1026	99.1315	0.868545
Average	76.0813	0.0825	12.6045	0.9929	1.10345	0.0308	0.0293	0.5386	3.90831	4.63155	0.0263	0.1026	99.1391	0.860861
2SD	0.600667	0.0996271	0.215264	0.200554	0.222884	0.110975	0.0176648	0.032169	0.112448	0.134986	0.0530915		0.609062	0.609062
GeoReM preferred value	76.1	0.063	12.7	1.02	1.13357	0.043	0.02	0.545	4.01	4.67	0.012	0.1026	99.3992	0.60083
2SE	0.3	0.004	0.17	0.02	0.0222269	0.003	0.004	0.014	0.04	0.07	0.005
OA-1 1	76.392	0.036	13.066	0.733	0.814614	0.033	0.048	0.505	3.86014	4.66796	0.063	0.1252	99.6109	0.389086
OA-1 2	76.582	0.036	12.918	0.537	0.596791	0.093	0.067	0.515	3.88331	4.60583	0.017	0.1252	99.4391	0.560873
OA-1 3	76.27	0.077	13.014	0.523	0.581232	0	0.093	0.522	3.95283	4.60485	0.032	0.1252	99.2721	0.727886
OA-1 4	76.974	0.082	13.093	0.774	0.86018	0	0.054	0.525	4.05903	4.57379	0.055	0.1252	100.401	-0.4012
OA-1 5	76.471	0.108	12.983	0.485	0.539001	0.046	0.034	0.464	3.8389	4.55243	0.045	0.1252	99.2065	0.793475
OA-1 6	76.398	0.046	13.041	0.576	0.640134	0.128	0.062	0.503	3.99048	4.62039	0	0.1252	99.5542	0.445795
OA-1 7	76.889	0.113	12.997	0.523	0.581232	0.074	0.047	0.52	3.83793	4.56602	0	0.1252	99.7504	0.249617
OA-1 8	76.724	0.052	12.902	0.577	0.641245	0	0.074	0.506	3.87172	4.62816	0	0.1252	99.5243	0.475676
OA-1 9	76.782	0.119	13.118	0.604	0.671251	0.191	0.08	0.474	3.976	4.61456	0	0.1252	100.151	-0.151014
OA-1 10	76.071	0.021	13.061	0.604	0.671251	0.079	0.096	0.536	3.94124	4.6534	0.032	0.1252	99.2871	0.712909
Average	76.5553	0.069	13.0193	0.5936	0.659693	0.0644	0.0655	0.507	3.92116	4.60874	0.0244	0.1252	99.6197	0.38031
2SD	0.574143	0.0714609	0.142092	0.185885	0.206582	0.124655	0.0408602	0.045127	0.148359	0.0739055	0.0490007		0.776987	0.776987
GeoReM preferred value	76.3	0.092	13	0.562	0.624575	0.07	0.064	0.511	4.11	4.58	0.015	0.1252	99.4918	0.508225
2SE	0.2	0.004	0.12	0.008	0.00889074	0.003	0.005	0.02	0.04	0.06	0.004
Obsidian 1	73.934	0.041	13.027	1.641	1.82371	0	0.029	0.749	4.055	4.96699	0.077	0.15	98.8527	1.1473
Obsidian 2	73.459	0.091	13.028	1.391	1.54588	0.076	0.05	0.714	4.073	4.98058	0	0.15	98.1675	1.83254
Obsidian 3	73.668	0.039	13.092	1.588	1.76481	0.027	0.037	0.735	4.067	4.98932	0	0.15	98.5691	1.43087
Obsidian 4	73.467	0.14	13.064	1.538	1.70925	0.064	0.035	0.753	3.979	4.98641	0	0.15	98.3477	1.65235
Obsidian 5	73.378	0.055	13.148	1.543	1.7148	0.082	0.03	0.743	4.118	5.01165	0.009	0.15	98.4395	1.56055
Obsidian 6	73.586	0.071	13.036	1.611	1.79037	0.032	0.04	0.73	4.011	5.10777	0.008	0.15	98.5621	1.43786
Obsidian 7	73.795	0.047	12.948	1.557	1.73036	0.067	0.026	0.742	4.079	5.10583	0.0063	0.15	98.6965	1.30351
Obsidian 8	74.106	0.069	12.965	1.49	1.6559	0.074	0.037	0.723	4.071	5.0699	0	0.15	98.9208	1.0792
Obsidian 9	74.031	0.078	12.921	1.621	1.80149	0.068	0.063	0.753	4.037	5.06019	0.00252	0.15	98.9652	1.0348
Obsidian 10	74.099	0.082	13.015	1.451	1.61256	0.041	0.037	0.726	4.061	5.12427	0	0.15	98.9478	1.05217
Average	73.7523	0.0713	13.0244	1.5431	1.71491	0.0531	0.0384	0.7368	4.0551	5.04029	0.010282	0.15	98.6469	1.35311
2SD	0.557813	0.0599633	0.136161	0.159074	0.176785	0.0534287	0.0218317	0.0267964	0.0770019	0.120062	0.0474358		0.552726	0.552726
SPI value	73.94	0.1	13.11	1.72	1.91151	0.06	0.07	0.76	4.06	5.04		0.15	99.2015	0.79849
BL5 1	65.7407	0.554	14.893	3.513	3.90415	0.111	0.841	2.11131	2.757	5.445	0.236	1.07114	97.6643	2.33572
BL5 2	65.3976	0.626	14.4584	3.312	3.68077	0.068	0.896	2.1053	2.639	5.409	0.29	1.07114	96.6412	3.35877
BL5 3	66.0827	0.662	14.3339	3.378	3.75412	0.008	0.907	2.08124	2.497	5.402	0.366	1.07114	97.1651	2.83485
BL5 4	65.5322	0.61	14.5016	3.141	3.49073	0.087	0.873	2.04715	2.686	5.409	0.225	1.07114	96.5328	3.46721
BL5 5	65.8742	0.636	14.1784	3.457	3.84191	0	0.933	2.01206	2.636	5.472	0.225	1.07114	96.8797	3.12027
BL5 6	66.6555	0.61	13.9154	3.734	4.14976	0.019	0.858	1.91081	2.59	5.365	0.245	1.07114	97.3896	2.61042
BL5 7	66.6332	0.765	14.0991	3.424	3.80524	0.057	0.852	1.84464	2.513	5.439	0.201	1.07114	97.2803	2.71969
BL5 8	65.9947	0.584	14.3279	3.449	3.83302	0	0.919	2.00906	2.697	5.373	0.336	1.07114	97.1448	2.85519
BL5 9	65.5879	0.539	14.4584	3.31	3.67855	0.019	0.881	1.96695	2.489	5.377	0.192	1.07114	96.2599	3.7401
BL5 10	65.6931	0.575	14.5718	3.384	3.76078	0.073	0.895	2.01006	2.49	5.388	0.321	1.07114	96.8489	3.15109
average	65.9192	0.6161	14.3738	3.4102	3.7899	0.0442	0.8855	2.00986	2.5994	5.4079	0.2637	1.07114	96.9807	3.01933
2SD	0.869472	0.12887	0.544435	0.307806	0.342078	0.0798376	0.0599129	0.16976	0.1966	0.0695985	0.120834		0.855871	0.855871
D2-0 1	68.8423	0.067	14.2426	1.006	1.11801	0.084	0.029	0.859163	4.417	4.88	0.024	0.158015	94.7211	5.27889
D2-0 2	70.1073	0.051	13.3925	0.763	0.847955	0.054	0.017	0.537353	4.179	5.138	0	0.158015	94.482	5.51795
D2-0 3	71.3429	0	12.5687	0.757	0.841287	0.068	0.001	0.363916	3.681	4.803	0	0.158015	93.8278	6.1722
D2-0 4	71.7557	0.041	12.369	0.817	0.907967	0.128	0.02	0.402012	3.649	4.8	0	0.158015	94.2307	5.76928
D2-0 5	69.8067	0.057	13.3878	0.83	0.922415	0.131	0.002	0.517302	3.882	4.904	0.049	0.158015	93.8172	6.18281
D2-0 6	70.4453	0.16	12.6246	0.805	0.894631	0	0.055	0.513292	3.995	4.94	0.013	0.158015	93.7988	6.20118
D2-0 7	70.7701	0	13.9642	0.851	0.945753	0.046	0.017	0.424067	3.693	4.794	0	0.158015	94.8121	5.18789
D2-0 8	69.9251	0.01	12.9652	0.996	1.1069	0.155	0.02	0.498254	3.899	4.826	0.02	0.158015	93.5834	6.41655
D2-0 9	71.696	0.052	12.2214	0.815	0.905745	0	0	0.396999	4.347	4.688	0	0.158015	94.4652	5.53477
D2-0 10	71.1415	0.005	12.3489	0.781	0.867959	0.191	0	0.386974	3.664	4.715	0.045	0.158015	93.5233	6.47666
average	70.5833	0.0443	13.0085	0.8421	0.935862	0.0857	0.0161	0.489933	3.9406	4.8488	0.0151	0.158015	94.1262	5.87382
2SD	1.86776	0.0962037	1.4195	0.177322	0.197065	0.128786	0.0343634	0.288389	0.576315	0.256243	0.0382442		0.949061	0.949061
D2-6 1	68.2453	0.144	13.817	0.731	0.812392	0.011	0	0.64763	4.075	4.941	0.012	0.153959	92.8593	7.14073
D2-6 2	69.2623	0.036	13.1295	0.685	0.76127	0.114	0.008	0.62758	3.877	4.872	0.033	0.153959	92.8746	7.12542
D2-6 3	68.8595	0.041	12.9408	0.805	0.894631	0.215	0.001	0.566426	4.007	4.896	0	0.153959	92.5753	7.42467
D2-6 4	69.1257	0.015	12.8615	0.765	0.850177	0.054	0.032	0.551388	3.989	4.774	0.084	0.153959	92.4907	7.50931
D2-6 5	70.2641	0.118	12.461	0.942	1.04689	0.057	0	0.503267	3.645	4.734	0.043	0.153959	93.0262	6.97375
D2-6 6	67.8627	0.123	12.9809	0.638	0.709037	0.141	0.027	0.609534	4.072	4.824	0	0.153959	91.5032	8.49678
D2-6 7	69.8836	0.026	12.2332	0.752	0.83573	0.033	0.006	0.430083	3.854	4.705	0	0.153959	92.1606	7.83943
D2-6 8	67.3193	0	13.6805	0.712	0.791276	0.187	0.01	0.690739	4.139	5	0.003	0.153959	91.9748	8.02518
D2-6 9	69.0154	0.046	12.8224	0.835	0.927971	0	0.005	0.578456	3.869	4.807	0.087	0.153959	92.3121	7.6879
D2-6 10	67.8648	0.072	13.9967	0.686	0.762381	0.044	0.004	0.690739	4.262	4.904	0.008	0.153959	92.7625	7.23746
average	68.7703	0.0621	13.0924	0.7551	0.839175	0.0856	0.0093	0.589584	3.9789	4.8457	0.027	0.153959	92.4539	7.54606
2SD	1.87758	0.099784	1.15251	0.176072	0.195676	0.149233	0.0224113	0.16423	0.349045	0.187254	0.0682805		0.947441	0.947441
