# Supplementary material for: Analysis of geological glasses by electron probe microanalysis under low beam current density conditions
Source: Royal Society of Chemistry journal article supplement (doi:10.1039/d3ja00183k), 2023-01-01
Supplement: d3ja00183k8.xlsx [file d3ja00183k8.xlsx]

## Sheet: Calculation process
c=100*A*M/(ε*d*ρ)							Absorbtance Intensity（A）					Molar absorptivity coefficients (ε）（Dixon et al., 1995）
Analysis Number	H2O Added in sample(wt.%)	Total(H2O+OH) (wt.%)	H2O(5200) (wt.%)	H2O(4500) (wt.%)	OH(3550) (wt.%)	OH (1630) (wt.%)	Absorbtance Intensity(A）at 5240	Absorbtance Intensity(A）at 4500	Absorbtance Intensity(A）at 3550	Absorbtance Intensity(A) at1630	d (cm)	Molar absorptivity coefficients (ε) OH(5200)	Molar absorptivity coefficients (ε) OH(4500)	Molar absorptivity coefficients (ε) OH(3550)	Molar absorptivity coefficients (ε) OH(1630)	ρ (g/L)
BL5 1	2	2.52835			2.52835				4.3355		0.0187	1.6	0.94	68	40.8	2430
BL5 2	2	2.55786			2.55786				4.3861		0.0187	1.6	0.94	68	40.8	2430
BL5 3	2	2.53237			2.53237				4.3424		0.0187	1.6	0.94	68	40.8	2430
BL5 4	2	2.53237			2.53237				4.3424		0.0187	1.6	0.94	68	40.8	2430
BL5 5	2	2.56993			2.56993				4.4068		0.0187	1.6	0.94	68	40.8	2430
BL5 6	2	2.52567			2.52567				4.3309		0.0187	1.6	0.94	68	40.8	2430
BL5 7	2	2.56993			2.56993				4.4068		0.0187	1.6	0.94	68	40.8	2430
BL5 8	2	2.52835			2.52835				4.3355		0.0187	1.6	0.94	68	40.8	2430
BL5 9	2	2.59676			2.59676				4.4528		0.0187	1.6	0.94	68	40.8	2430
BL5 10	2	2.52433			2.52433				4.3286		0.0187	1.6	0.94	68	40.8	2430
BL5 average		2.54659
BL5 2sd		0.0504918
D2-0 1	6.5	5.47974	4.2626	1.21714			0.2318	0.071121			0.0259	1.61	1.73	100	55	2350
D2-0 2	6.5	5.56081	4.22766	1.33315			0.2299	0.0779			0.0259	1.61	1.73	100	55	2350
D2-0 3	6.5	5.39801	4.19493	1.20309			0.22812	0.0703			0.0259	1.61	1.73	100	55	2350
D2-0 4	6.5	5.39981	3.96911	1.4307			0.21584	0.0836			0.0259	1.61	1.73	100	55	2350
D2-0 5	6.5	5.70784	4.47224	1.2356			0.2432	0.0722			0.0259	1.61	1.73	100	55	2350
D2-0 6	6.5	5.05227	3.81666	1.2356			0.20755	0.0722			0.0259	1.61	1.73	100	55	2350
D2-0 7	6.5	5.59836	4.41582	1.18255			0.240132	0.0691			0.0259	1.61	1.73	100	55	2350
D2-0 8	6.5	6.53528	4.68187	1.8534			0.2546	0.1083			0.0259	1.61	1.73	100	55	2350
D2-0 9	6.5	5.69549	4.26479	1.4307			0.231919	0.0836			0.0259	1.61	1.73	100	55	2350
D2-0 10	6.5	5.27601	4.04041	1.2356			0.219717	0.0722			0.0259	1.61	1.73	100	55	2350
D2-0 average		5.57036
D2-0 2sd		0.785582
D2-6 1	8.9	7.68706	5.82936	1.55734		0.300371	0.317	0.091		0.558	0.0259	1.61	1.73	100	55	2350
D2-6 2	8.9	7.95454	5.95808	1.66002		0.336438	0.324	0.097		0.625	0.0259	1.61	1.73	100	55	2350
D2-6 3	8.9	7.87163	5.99486	1.52311		0.353663	0.326	0.089		0.657	0.0259	1.61	1.73	100	55	2350
D2-6 4	8.9	7.74623	5.86613	1.59156		0.288529	0.319	0.093		0.536	0.0259	1.61	1.73	100	55	2350
D2-6 5	8.9	7.7685	5.86613	1.6429		0.259461	0.319	0.096		0.482	0.0259	1.61	1.73	100	55	2350
D2-6 6	8.9	6.86817	4.98346	1.62579		0.258922	0.271	0.095		0.481	0.0259	1.61	1.73	100	55	2350
D2-6 7	8.9	7.93406	6.0868	1.59156		0.255693	0.331	0.093		0.475	0.0259	1.61	1.73	100	55	2350
D2-6 8	8.9	7.77757	5.93969	1.62579		0.21209	0.323	0.095		0.394	0.0259	1.61	1.73	100	55	2350
D2-6 9	8.9	7.89097	5.96709	1.72847		0.195403	0.32449	0.101		0.363	0.0259	1.61	1.73	100	55	2350
D2-6 10	8.9	7.15466	5.25929	1.6429		0.252463	0.286	0.096		0.469	0.0259	1.61	1.73	100	55	2350
D2-6 average		7.66534
D2-6 2sd		0.722906
