# Supplementary figures and images for: Analysis of geological glasses by electron probe microanalysis under low beam current density conditions
Source: Royal Society of Chemistry journal article supplement (doi:10.1039/d3ja00183k), 2023-01-01

### ESI Figure 1

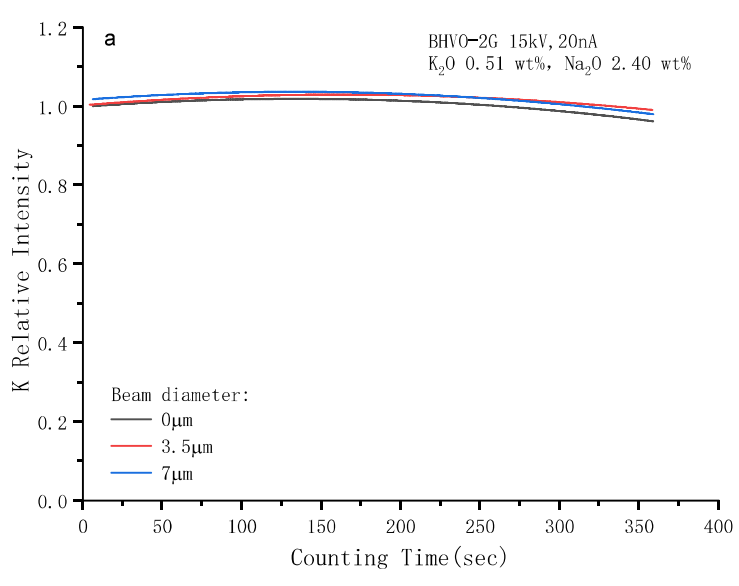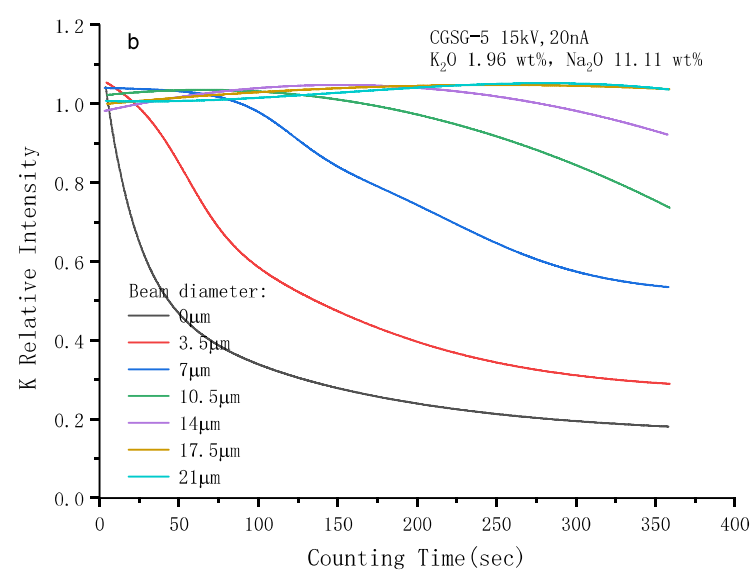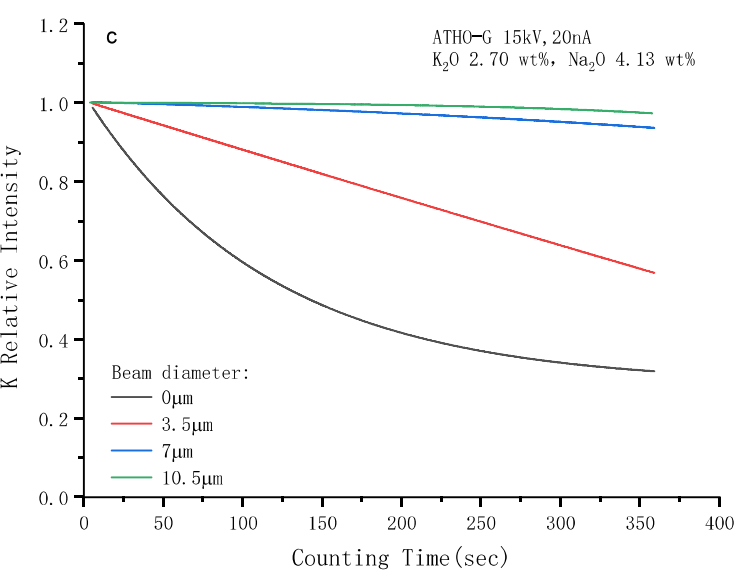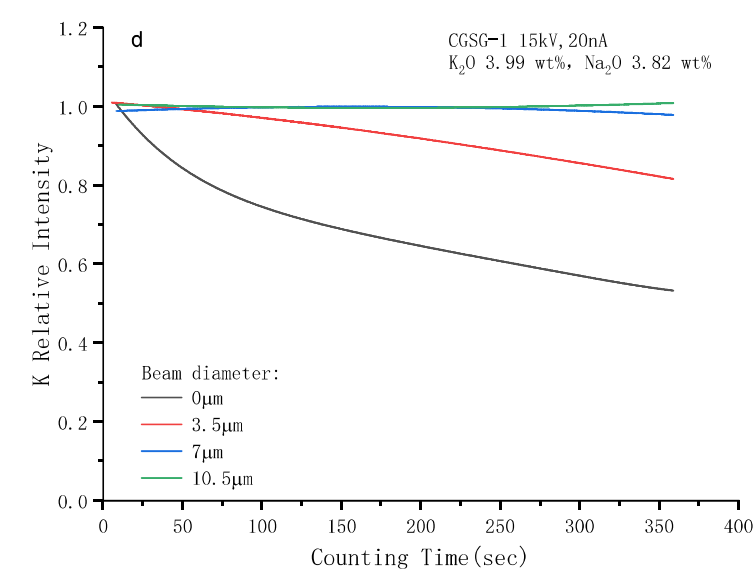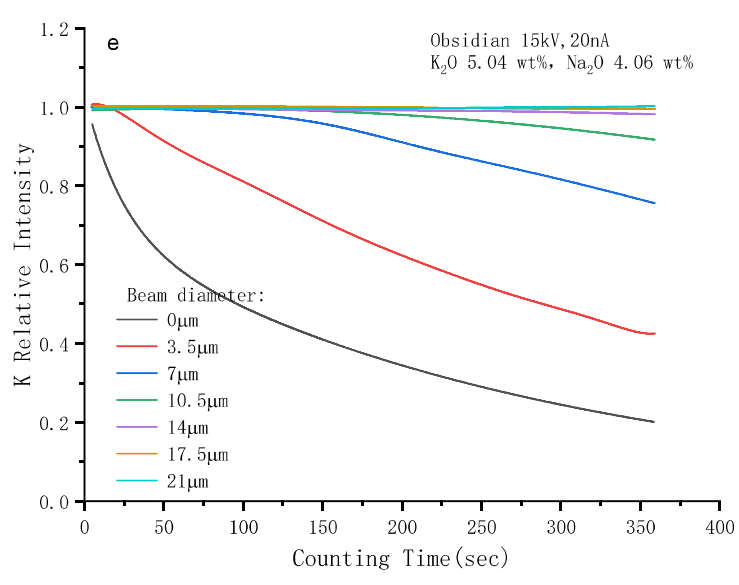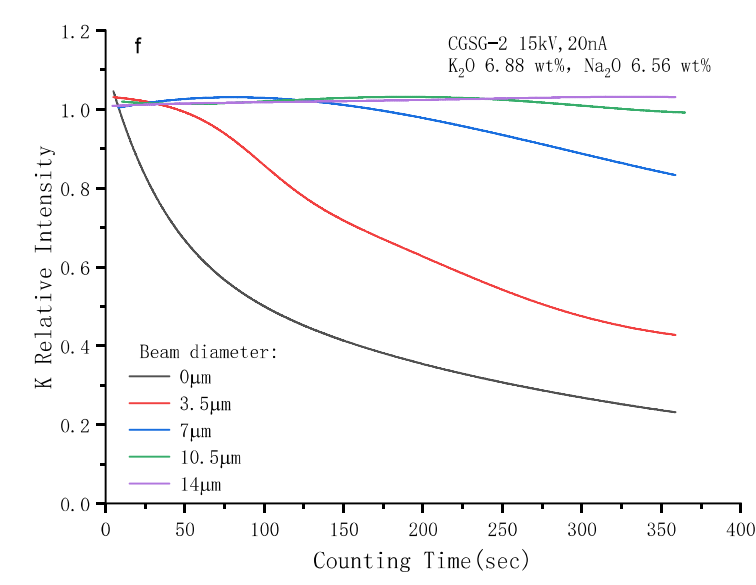

Supplement: d3ja00183k2.pdf [file d3ja00183k2.pdf]

## ESI Figure 2

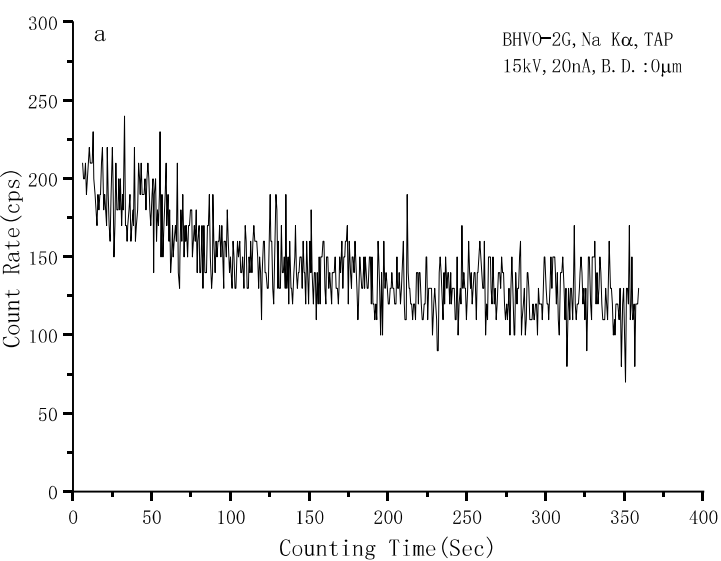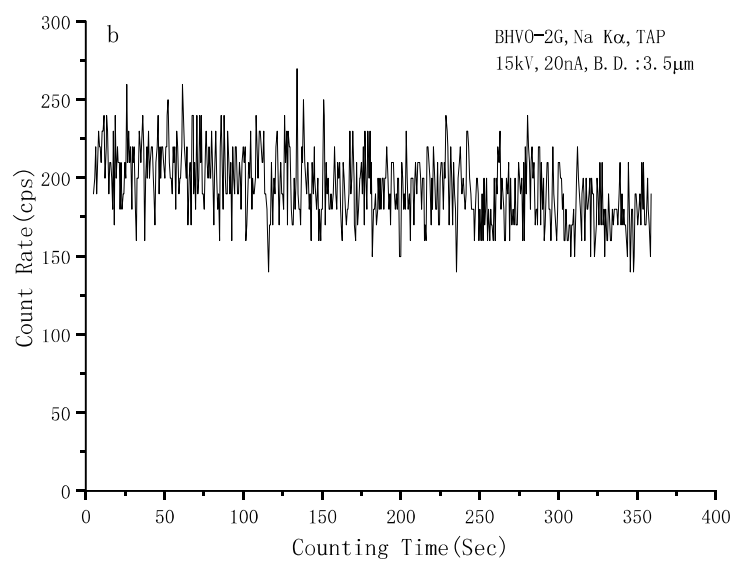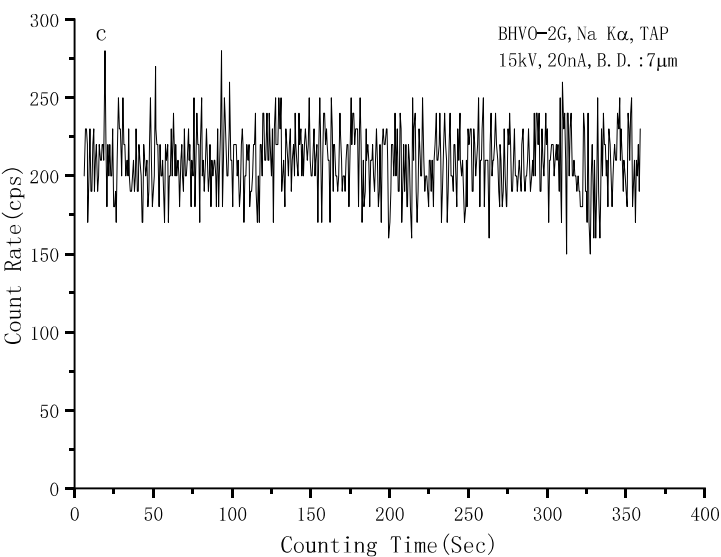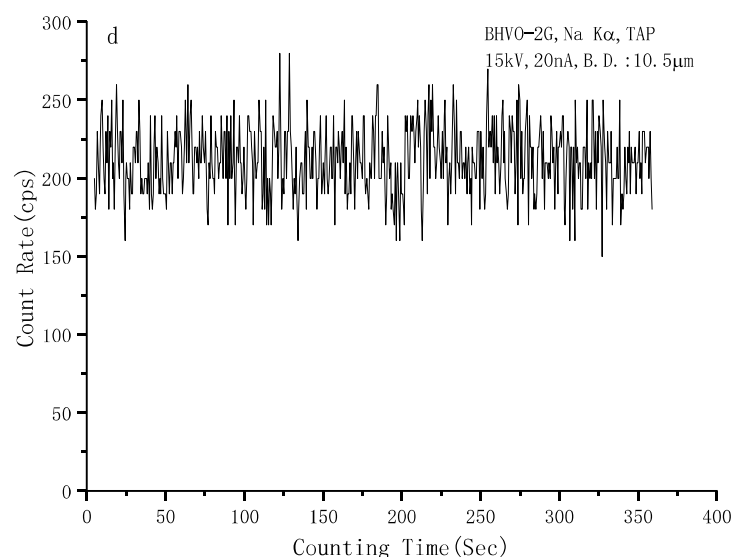

Supplement: d3ja00183k3.pdf [file d3ja00183k3.pdf]

ESI Figure 3

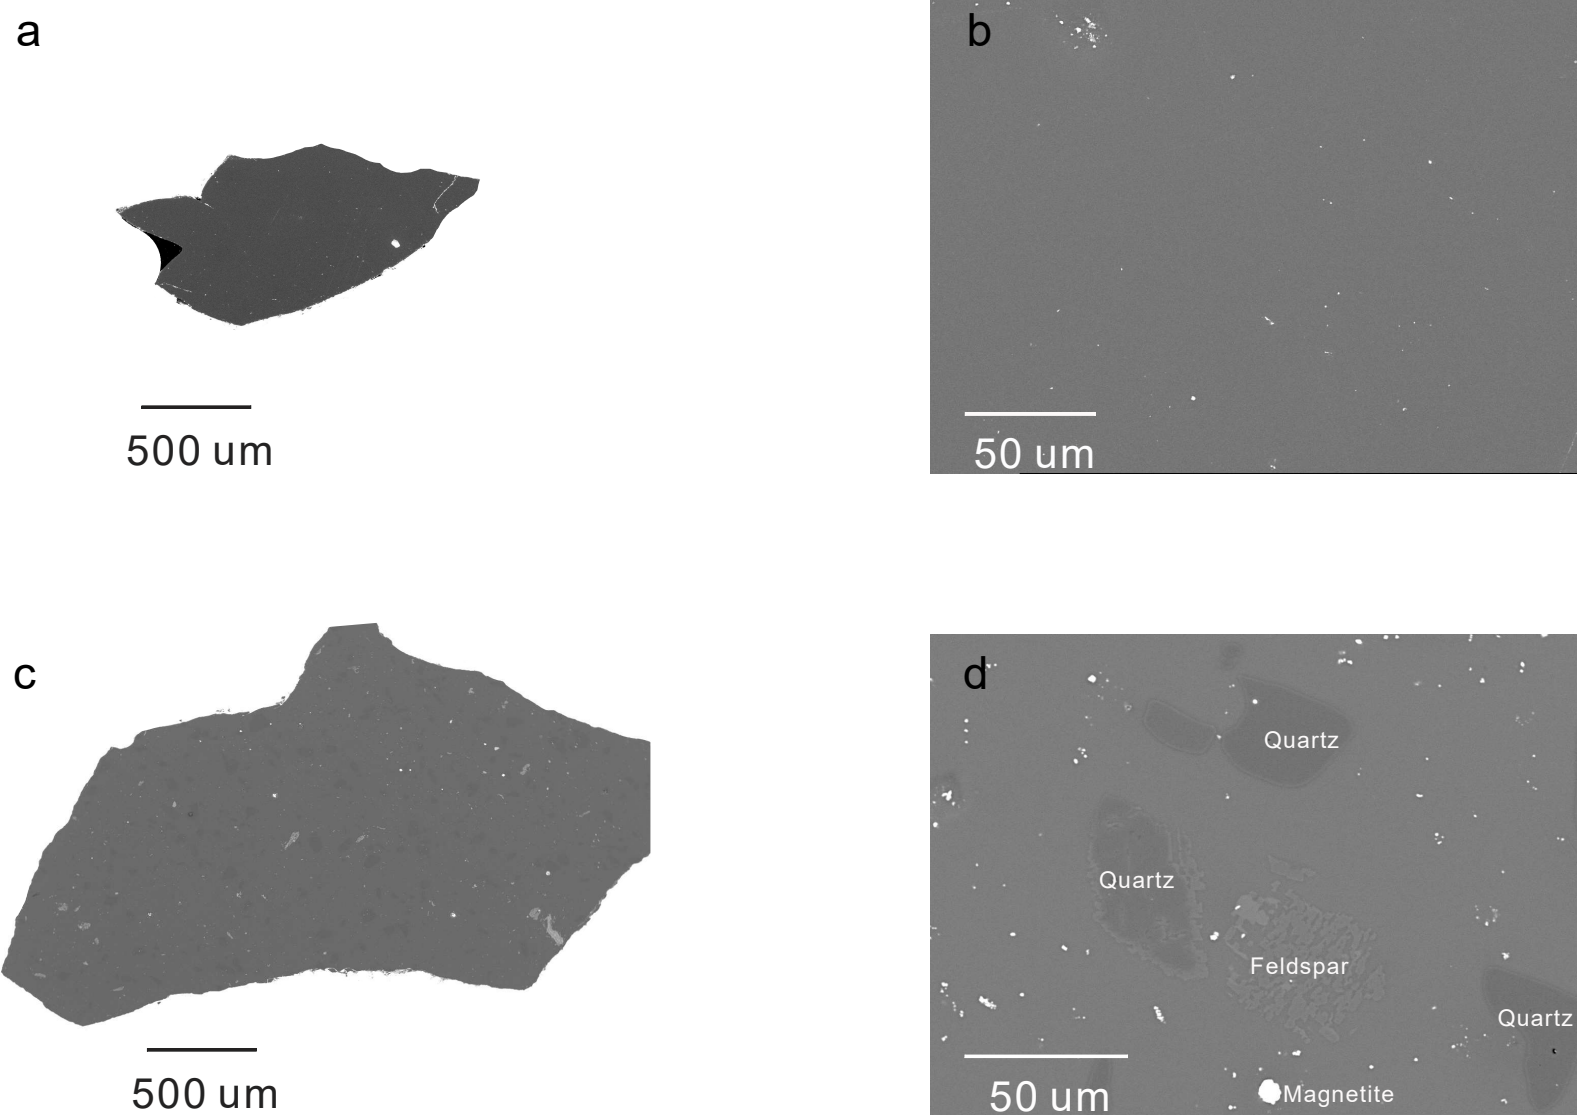

Supplement: d3ja00183k4.pdf [file d3ja00183k4.pdf]
